# Supplementary material for: Ancient Trypsinogen Duplications Shape Pancreatic Disease Risk through Pseudogene Enhancers
Source: Research Square preprint supplement (doi:10.21203/rs.3.rs-8799261/v1), 2026-02-11
Supplement: Supplementary file 1 [file 0649917fd51bf1f9f913f8c8.xlsx]

## Sheet: Annotation
hits	Gene ID	Type	Tax ID	Homologene Gene ID	Homologene Gene Tax ID	Gene Symbol	Description	Biological Process (GO)	Kinase Class (UniProt)	Protein Function (Protein Atlas)	Subcellular Location (Protein Atlas)	Drug (DrugBank)	Canonical Pathways	Hallmark Gene Sets	GO:0007156 homophilic cell adhesion via p	GO:0051606 detection of stimulus	R-HSA-189085 Digestion of dietary carbohydr	GO:0051092 positive regulation of NF-kapp	M3008 NABA ECM GLYCOPROTEINS	GO:0007586 digestion	R-HSA-9659379 Sensory processing of sound	GO:0008038 neuron recognition	R-HSA-112316 Neuronal System	GO:0007268 chemical synaptic transmission	GO:0050808 synapse organization	GO:0002825 regulation of T-helper 1 type	GO:0042531 positive regulation of tyrosin	GO:0070252 actin-mediated cell contractio	GO:0050691 regulation of defense response	GO:0043507 positive regulation of JUN kin	GO:0060976 coronary vasculature developme	WP3925 Amino acid metabolism	GO:0120254 olefinic compound metabolic pr
AMY1A	276	symbol	H. sapiens	276	H. sapiens	AMY1A	amylase alpha 1A	GO:0009311 oligosaccharide metabolic process;GO:0005975 carbohydrate metabolic process;GO:0044238 primary metabolic process		Predicted secreted proteins					0.0	0.0	1.0	0.0	0.0	0.0	0.0	0.0	0.0	0.0	0.0	0.0	0.0	0.0	0.0	0.0	0.0	0.0	0.0
AMY1B	277	symbol	H. sapiens	277	H. sapiens	AMY1B	amylase alpha 1B	GO:0009311 oligosaccharide metabolic process;GO:0005975 carbohydrate metabolic process;GO:0044238 primary metabolic process		Predicted secreted proteins					0.0	0.0	1.0	0.0	0.0	0.0	0.0	0.0	0.0	0.0	0.0	0.0	0.0	0.0	0.0	0.0	0.0	0.0	0.0
AMY1C	278	symbol	H. sapiens	278	H. sapiens	AMY1C	amylase alpha 1C	GO:0009311 oligosaccharide metabolic process;GO:0005975 carbohydrate metabolic process;GO:0044238 primary metabolic process		Predicted secreted proteins					0.0	0.0	1.0	0.0	0.0	0.0	0.0	0.0	0.0	0.0	0.0	0.0	0.0	0.0	0.0	0.0	0.0	0.0	0.0
AMY2A	279	symbol	H. sapiens	279	H. sapiens	AMY2A	amylase alpha 2A	GO:0044245 polysaccharide digestion;GO:0007586 digestion;GO:0016052 carbohydrate catabolic process		Enzymes; Predicted secreted proteins; FDA approved drug targets:Small molecule drugs; ENZYME proteins:Hydrolases		Acarbose; Maltosyl-Alpha (1,4)-D-Gluconhydroximo-1,5-Lactam; N-[4-hydroxymethyl-cyclohexan-6-yl-1,2,3-triol]-4,6-dideoxy-4-aminoglucopyranoside; Beta-D-Glucose; 4-O-(4,6-Dideoxy-4-{[4,5,6-Trihydroxy-3-(Hydroxymethyl)Cyclohex-2-En-1-Yl]Amino}-Beta-D-Lyxo-Hexopyranosyl)-Alpha-D-Erythro-Hexopyranose; Pidolic acid; 5-Hydroxymethyl-Chonduritol; 4,6-dideoxy-4-amino-alpha-D-glucose; 4,6-Dideoxy-4-{[4,5,…			0.0	0.0	1.0	0.0	0.0	1.0	0.0	0.0	0.0	0.0	0.0	0.0	0.0	0.0	0.0	0.0	0.0	0.0	0.0
AMY2B	280	symbol	H. sapiens	280	H. sapiens	AMY2B	amylase alpha 2B	GO:0005975 carbohydrate metabolic process;GO:0044238 primary metabolic process;GO:0071704 organic substance metabolic process		Enzymes; Predicted secreted proteins; ENZYME proteins:Hydrolases		1,4-dithio-alpha-D-glucopyranose; N-[4-hydroxymethyl-cyclohexan-6-yl-1,2,3-triol]-4,6-dideoxy-4-aminoglucopyranoside; Beta-D-Glucose; 4-Methylthio-Alpha-D-Mannose; Pidolic acid; 5-Hydroxymethyl-Chonduritol; alpha-maltotriose; Maltose; P-Nitrophenol			0.0	0.0	1.0	0.0	0.0	0.0	0.0	0.0	0.0	0.0	0.0	0.0	0.0	0.0	0.0	0.0	0.0	0.0	0.0
PRSS1	5644	symbol	H. sapiens	5644	H. sapiens	PRSS1	serine protease 1	GO:0022617 extracellular matrix disassembly;GO:0007586 digestion;GO:0030198 extracellular matrix organization		Disease related genes; Human disease related genes:Digestive system diseases:Pancreas diseases; ENZYME proteins:Hydrolases; Cancer-related genes:Candidate cancer biomarkers; Predicted secreted proteins; Predicted intracellular proteins; Enzymes; Peptidases:Serine-type peptidases; Potential drug targets	Vesicles (Approved); Additional: Endoplasmic reticulum	2H-Benzimidazol-2-amine; Bis(5-Amidino-Benzimidazolyl)Methane; 2-{2-hydroxy-[1,1'-biphenyl]-3-yl}-1H-1,3-benzodiazole-5-carboximidamide; Nalpha-(2-Naphthylsulfonylglycyl)-3-Amidino-D,L-Phenylalanine-Isopropylester; CRA_17693; N-Alpha-(2-Naphthylsulfonyl)-N(3-Amidino-L-Phenylalaninyl)Isopipecolinic Acid Methyl Ester; Hemi-Babim; CRA_10991; Monoisopropylphosphorylserine; [4-(6-Chloro-Naphthalene-2-…	(M3468)NABA ECM REGULATORS; (M5885)NABA MATRISOME ASSOCIATED; (M5889)NABA MATRISOME		0.0	0.0	1.0	0.0	0.0	1.0	0.0	0.0	0.0	1.0	0.0	0.0	0.0	0.0	0.0	0.0	0.0	0.0	0.0
PRSS2	5645	symbol	H. sapiens	5645	H. sapiens	PRSS2	serine protease 2	GO:0030574 collagen catabolic process;GO:0022617 extracellular matrix disassembly;GO:0032963 collagen metabolic process		Human disease related genes:Digestive system diseases:Pancreas diseases; ENZYME proteins:Hydrolases; Predicted secreted proteins; Enzymes; Peptidases:Serine-type peptidases	Vesicles (Approved); Additional: Endoplasmic reticulum	Monoisopropylphosphorylserine; O-Benzylsulfonyl-Serine; Benzylamine; Benzamidine; Phosphorylisopropane; Phenethylamine; 3-Phenylpropylamine	(M3468)NABA ECM REGULATORS; (M5885)NABA MATRISOME ASSOCIATED; (M5889)NABA MATRISOME	(M5930)HALLMARK EPITHELIAL MESENCHYMAL TRANSITION	0.0	0.0	1.0	0.0	0.0	1.0	0.0	0.0	0.0	1.0	0.0	0.0	0.0	0.0	0.0	0.0	0.0	0.0	0.0
LCLAT1	253558	symbol	H. sapiens	253558	H. sapiens	LCLAT1	lysocardiolipin acyltransferase 1	GO:0035965 cardiolipin acyl-chain remodeling;GO:0036149 phosphatidylinositol acyl-chain remodeling;GO:0016024 CDP-diacylglycerol biosynthetic process		Enzymes; ENZYME proteins:Transferases	Endoplasmic reticulum (Supported); Additional: Cytosol			(M5947)HALLMARK IL2 STAT5 SIGNALING	0.0	0.0	0.0	0.0	0.0	0.0	0.0	0.0	0.0	0.0	0.0	0.0	0.0	0.0	0.0	0.0	0.0	0.0	0.0
LTBP1	4052	symbol	H. sapiens	4052	H. sapiens	LTBP1	latent transforming growth factor beta binding protein 1	GO:0035583 sequestering of TGFbeta in extracellular matrix;GO:0071694 maintenance of protein location in extracellular region;GO:1901388 regulation of transforming growth factor beta activation		Predicted secreted proteins; Predicted intracellular proteins			(M3008)NABA ECM GLYCOPROTEINS; (M5884)NABA CORE MATRISOME; (M5889)NABA MATRISOME	(M5942)HALLMARK UV RESPONSE DN	0.0	0.0	0.0	0.0	1.0	0.0	0.0	0.0	0.0	0.0	0.0	0.0	0.0	0.0	0.0	0.0	0.0	0.0	0.0
SRSF7	6432	symbol	H. sapiens	6432	H. sapiens	SRSF7	serine and arginine rich splicing factor 7	GO:0048025 negative regulation of mRNA splicing, via spliceosome;GO:0050686 negative regulation of mRNA processing;GO:0033119 negative regulation of RNA splicing		Predicted intracellular proteins	Nucleoplasm (Enhanced)			(M5926)HALLMARK MYC TARGETS V1	0.0	0.0	0.0	0.0	0.0	0.0	0.0	0.0	0.0	0.0	0.0	0.0	0.0	0.0	0.0	0.0	0.0	0.0	0.0
STON1-GTF2A1L	286749	symbol	H. sapiens	286749	H. sapiens	STON1-GTF2A1L	STON1-GTF2A1L readthrough			Predicted intracellular proteins	Nucleoplasm (Approved); Additional: Cytosol				0.0	0.0	0.0	0.0	0.0	0.0	0.0	0.0	0.0	0.0	0.0	0.0	0.0	0.0	0.0	0.0	0.0	0.0	0.0
GTF2A1L	11036	symbol	H. sapiens	11036	H. sapiens	GTF2A1L	general transcription factor IIA subunit 1 like	GO:0006367 transcription initiation at RNA polymerase II promoter;GO:0006352 DNA-templated transcription initiation;GO:0050890 cognition		Predicted intracellular proteins	Nucleoplasm (Supported); Additional: Cytosol				0.0	0.0	0.0	0.0	0.0	0.0	0.0	0.0	0.0	0.0	0.0	0.0	0.0	0.0	0.0	0.0	0.0	0.0	0.0
TRIM43	129868	symbol	H. sapiens	129868	H. sapiens	TRIM43	tripartite motif containing 43	GO:0016567 protein ubiquitination;GO:0045087 innate immune response;GO:0032446 protein modification by small protein conjugation		Predicted intracellular proteins					0.0	0.0	0.0	0.0	0.0	0.0	0.0	0.0	0.0	0.0	0.0	0.0	0.0	0.0	0.0	0.0	0.0	0.0	0.0
ANKRD36	375248	symbol	H. sapiens	375248	H. sapiens	ANKRD36	ankyrin repeat domain 36			Predicted intracellular proteins	Cytosol;Nucleoplasm (Approved)				0.0	0.0	0.0	0.0	0.0	0.0	0.0	0.0	0.0	0.0	0.0	0.0	0.0	0.0	0.0	0.0	0.0	0.0	0.0
IL1RL1	9173	symbol	H. sapiens	9173	H. sapiens	IL1RL1	interleukin 1 receptor like 1	GO:0002826 negative regulation of T-helper 1 type immune response;GO:0032754 positive regulation of interleukin-5 production;GO:0032674 regulation of interleukin-5 production		ENZYME proteins:Hydrolases; Candidate cardiovascular disease genes; Predicted secreted proteins; Predicted intracellular proteins; Enzymes	Plasma membrane (Supported); Additional: Cytosol;Focal adhesion sites			(M5947)HALLMARK IL2 STAT5 SIGNALING	0.0	0.0	0.0	0.0	0.0	0.0	0.0	0.0	0.0	0.0	0.0	1.0	0.0	0.0	0.0	0.0	0.0	0.0	0.0
IL18R1	8809	symbol	H. sapiens	8809	H. sapiens	IL18R1	interleukin 18 receptor 1	GO:0035655 interleukin-18-mediated signaling pathway;GO:0071351 cellular response to interleukin-18;GO:0070673 response to interleukin-18		CD markers; Enzymes; ENZYME proteins:Hydrolases	Mitochondria (Approved)		(M290)PID IL12 STAT4 PATHWAY; (M196)PID IL23 PATHWAY; (M54)PID IL12 2PATHWAY	(M5897)HALLMARK IL6 JAK STAT3 SIGNALING; (M5947)HALLMARK IL2 STAT5 SIGNALING; (M5932)HALLMARK INFLAMMATORY RESPONSE	0.0	0.0	0.0	1.0	0.0	0.0	0.0	0.0	0.0	0.0	0.0	1.0	0.0	0.0	0.0	0.0	0.0	0.0	0.0
LRP1B	53353	symbol	H. sapiens	53353	H. sapiens	LRP1B	LDL receptor related protein 1B	GO:0006898 receptor-mediated endocytosis;GO:0006897 endocytosis;GO:0015031 protein transport		Cancer-related genes:Candidate cancer biomarkers; Predicted intracellular proteins	Vesicles (Approved)				0.0	0.0	0.0	0.0	0.0	0.0	0.0	0.0	0.0	0.0	0.0	0.0	0.0	0.0	0.0	0.0	0.0	0.0	0.0
ZEB2	9839	symbol	H. sapiens	9839	H. sapiens	ZEB2	zinc finger E-box binding homeobox 2	GO:1903056 regulation of melanosome organization;GO:0097324 melanocyte migration;GO:0045636 positive regulation of melanocyte differentiation		Predicted intracellular proteins; Disease related genes; Human disease related genes:Congenital malformations:Other congenital malformations; Transcription factors:Helix-turn-helix domains	Nucleoli (Supported); Additional: Cytosol;Nucleoplasm				0.0	0.0	0.0	0.0	0.0	0.0	0.0	0.0	0.0	0.0	0.0	0.0	0.0	0.0	0.0	0.0	0.0	0.0	0.0
DAPL1	92196	symbol	H. sapiens	92196	H. sapiens	DAPL1	death associated protein like 1	GO:0034198 cellular response to amino acid starvation;GO:1990928 response to amino acid starvation;GO:0010507 negative regulation of autophagy		Predicted intracellular proteins	Microtubules;Nuclear bodies;Nucleoplasm (Approved)				0.0	0.0	0.0	0.0	0.0	0.0	0.0	0.0	0.0	0.0	0.0	0.0	0.0	0.0	0.0	0.0	0.0	0.0	0.0
C2orf80	389073	symbol	H. sapiens	389073	H. sapiens	C2orf80	chromosome 2 open reading frame 80			Predicted intracellular proteins	Golgi apparatus (Approved)				0.0	0.0	0.0	0.0	0.0	0.0	0.0	0.0	0.0	0.0	0.0	0.0	0.0	0.0	0.0	0.0	0.0	0.0	0.0
ERBB4	2066	symbol	H. sapiens	2066	H. sapiens	ERBB4	erb-b2 receptor tyrosine kinase 4	GO:0072046 establishment of planar polarity involved in nephron morphogenesis;GO:0021551 central nervous system morphogenesis;GO:0061026 cardiac muscle tissue regeneration	yes	Kinases:Tyr protein kinases; Disease related genes; ENZYME proteins:Transferases; Human disease related genes:Nervous system diseases:Neurodegenerative diseases; Cancer-related genes:Candidate cancer biomarkers; FDA approved drug targets:Small molecule drugs; Transporters:Accessory Factors Involved in Transport; Predicted intracellular proteins; Enzymes		Afatinib; Fostamatinib; Brigatinib; Zanubrutinib	(M201)PID ERBB NETWORK PATHWAY; (M13)PID ERBB4 PATHWAY; (M295)SIG PIP3 SIGNALING IN CARDIAC MYOCTES		0.0	0.0	0.0	0.0	0.0	0.0	0.0	0.0	1.0	0.0	1.0	0.0	1.0	0.0	0.0	0.0	0.0	0.0	0.0
TM4SF20	79853	symbol	H. sapiens	79853	H. sapiens	TM4SF20	transmembrane 4 L six family member 20	GO:0045861 negative regulation of proteolysis;GO:0030162 regulation of proteolysis;GO:0051248 negative regulation of protein metabolic process		Predicted intracellular proteins; Transporters:Accessory Factors Involved in Transport; Disease related genes; Potential drug targets	Focal adhesion sites;Plasma membrane (Supported)				0.0	0.0	0.0	0.0	0.0	0.0	0.0	0.0	0.0	0.0	0.0	0.0	0.0	0.0	0.0	0.0	0.0	0.0	0.0
SCYGR1	112441428	symbol	H. sapiens	112441428	H. sapiens	SCYGR1	small cysteine and glycine repeat containing 1			Predicted intracellular proteins					0.0	0.0	0.0	0.0	0.0	0.0	0.0	0.0	0.0	0.0	0.0	0.0	0.0	0.0	0.0	0.0	0.0	0.0	0.0
LRRFIP1	9208	symbol	H. sapiens	9208	H. sapiens	LRRFIP1	LRR binding FLII interacting protein 1	GO:0000122 negative regulation of transcription by RNA polymerase II;GO:0045892 negative regulation of DNA-templated transcription;GO:1903507 negative regulation of nucleic acid-templated transcription		Predicted intracellular proteins; Transcription factors:Yet undefined DNA-binding domains	Cytosol (Supported)				0.0	0.0	0.0	0.0	0.0	0.0	0.0	0.0	0.0	0.0	0.0	0.0	0.0	0.0	0.0	0.0	0.0	0.0	0.0
CNTN4	152330	symbol	H. sapiens	152330	H. sapiens	CNTN4	contactin 4	GO:0070593 dendrite self-avoidance;GO:0007158 neuron cell-cell adhesion;GO:0007413 axonal fasciculation		Predicted intracellular proteins; Disease related genes					1.0	0.0	0.0	0.0	0.0	0.0	0.0	1.0	0.0	1.0	0.0	0.0	0.0	0.0	0.0	0.0	0.0	0.0	0.0
SRGAP3	9901	symbol	H. sapiens	9901	H. sapiens	SRGAP3	SLIT-ROBO Rho GTPase activating protein 3	GO:0051056 regulation of small GTPase mediated signal transduction;GO:0030336 negative regulation of cell migration;GO:2000146 negative regulation of cell motility		Predicted intracellular proteins; Disease related genes	Cytosol (Approved); Additional: Centrosome				0.0	0.0	0.0	0.0	0.0	0.0	0.0	0.0	0.0	0.0	0.0	0.0	0.0	0.0	0.0	0.0	0.0	0.0	0.0
OSBPL10	114884	symbol	H. sapiens	114884	H. sapiens	OSBPL10	oxysterol binding protein like 10	GO:0036150 phosphatidylserine acyl-chain remodeling;GO:0006658 phosphatidylserine metabolic process;GO:0015918 sterol transport		Predicted intracellular proteins	Cytosol;Golgi apparatus;Plasma membrane (Approved)				0.0	0.0	0.0	0.0	0.0	0.0	0.0	0.0	0.0	0.0	0.0	0.0	0.0	0.0	0.0	0.0	0.0	0.0	0.0
RP11-316F12.1						None	None	None	None	None	None	None	None	None	nan	nan	nan	nan	nan	nan	nan	nan	nan	nan	nan	nan	nan	nan	nan	nan	nan	nan	nan
CFAP20DC	200844	symbol	H. sapiens	200844	H. sapiens	CFAP20DC	CFAP20 domain containing			Predicted intracellular proteins	Golgi apparatus (Approved)				0.0	0.0	0.0	0.0	0.0	0.0	0.0	0.0	0.0	0.0	0.0	0.0	0.0	0.0	0.0	0.0	0.0	0.0	0.0
FHIT	2272	symbol	H. sapiens	2272	H. sapiens	FHIT	fragile histidine triad diadenosine triphosphatase	GO:0015962 diadenosine triphosphate metabolic process;GO:0015964 diadenosine triphosphate catabolic process;GO:0015961 diadenosine polyphosphate catabolic process		Human disease related genes:Cancers:Cancers of the lung and pleura; Disease related genes; ENZYME proteins:Hydrolases; Cancer-related genes:Candidate cancer biomarkers; Predicted intracellular proteins; Enzymes; Potential drug targets	Nucleoli fibrillar center;Plasma membrane (Approved)	Adenosine monotungstate; Ado-P-Ch2-P-Ps-Ado			0.0	0.0	0.0	0.0	0.0	0.0	0.0	0.0	0.0	0.0	0.0	0.0	0.0	0.0	0.0	0.0	0.0	0.0	0.0
ROBO2	6092	symbol	H. sapiens	6092	H. sapiens	ROBO2	roundabout guidance receptor 2	GO:0050925 negative regulation of negative chemotaxis;GO:0061364 apoptotic process involved in luteolysis;GO:0035480 regulation of Notch signaling pathway involved in heart induction		Predicted intracellular proteins; Disease related genes; Human disease related genes:Urinary system diseases:Kidney diseases	Plasma membrane (Approved); Additional: Centriolar satellite;Nucleoplasm				1.0	0.0	0.0	0.0	0.0	0.0	0.0	1.0	0.0	0.0	0.0	0.0	0.0	0.0	0.0	0.0	0.0	0.0	0.0
EPHA3	2042	symbol	H. sapiens	2042	H. sapiens	EPHA3	EPH receptor A3	GO:0097156 fasciculation of motor neuron axon;GO:0097155 fasciculation of sensory neuron axon;GO:0007413 axonal fasciculation	yes	Kinases:Tyr protein kinases; Disease related genes; ENZYME proteins:Transferases; Cancer-related genes:Candidate cancer biomarkers; Predicted intracellular proteins; Enzymes; Potential drug targets	Cytosol;Nuclear membrane;Plasma membrane (Supported); Additional: Actin filaments;Nucleoplasm	Fostamatinib	(M177)PID EPHA FWDPATHWAY		0.0	0.0	0.0	0.0	0.0	0.0	0.0	1.0	0.0	0.0	0.0	0.0	0.0	0.0	0.0	0.0	0.0	0.0	0.0
CD96	10225	symbol	H. sapiens	10225	H. sapiens	CD96	CD96 molecule	GO:0002728 negative regulation of natural killer cell cytokine production;GO:0002727 regulation of natural killer cell cytokine production;GO:0002716 negative regulation of natural killer cell mediated immunity		CD markers; Predicted intracellular proteins; Disease related genes; Human disease related genes:Congenital malformations:Other congenital malformations				(M5950)HALLMARK ALLOGRAFT REJECTION	0.0	0.0	0.0	0.0	0.0	0.0	0.0	0.0	0.0	0.0	0.0	1.0	0.0	0.0	0.0	0.0	0.0	0.0	0.0
RPN1	6184	symbol	H. sapiens	6184	H. sapiens	RPN1	ribophorin I	GO:0018279 protein N-linked glycosylation via asparagine;GO:0006487 protein N-linked glycosylation;GO:0006486 protein glycosylation		Cancer-related genes; Transporters	Endoplasmic reticulum (Enhanced); Additional: Cytosol			(M5941)HALLMARK UV RESPONSE UP; (M5924)HALLMARK MTORC1 SIGNALING	0.0	0.0	0.0	0.0	0.0	0.0	0.0	0.0	0.0	0.0	0.0	0.0	0.0	0.0	0.0	0.0	0.0	0.0	0.0
ALG1L2	644974	symbol	H. sapiens	644974	H. sapiens	ALG1L2	ALG1 chitobiosyldiphosphodolichol beta-mannosyltransferase like 2	GO:0097502 mannosylation;GO:0006486 protein glycosylation;GO:0043413 macromolecule glycosylation		Predicted intracellular proteins	Endoplasmic reticulum (Uncertain); Additional: Nucleoli fibrillar center				0.0	0.0	0.0	0.0	0.0	0.0	0.0	0.0	0.0	0.0	0.0	0.0	0.0	0.0	0.0	0.0	0.0	0.0	0.0
PCCB	5096	symbol	H. sapiens	5096	H. sapiens	PCCB	propionyl-CoA carboxylase subunit beta	GO:0019626 short-chain fatty acid catabolic process;GO:0046459 short-chain fatty acid metabolic process;GO:0009081 branched-chain amino acid metabolic process		ENZYME proteins:Ligase; Disease related genes; Predicted intracellular proteins; Human disease related genes:Congenital disorders of metabolism:Congenital disorders of amino acid metabolism; Enzymes; Potential drug targets		Biotin; Valine			0.0	0.0	0.0	0.0	0.0	0.0	0.0	0.0	0.0	0.0	0.0	0.0	0.0	0.0	0.0	0.0	0.0	0.0	0.0
ANKUB1	389161	symbol	H. sapiens	389161	H. sapiens	ANKUB1	ankyrin repeat and ubiquitin domain containing 1			Predicted intracellular proteins					0.0	0.0	0.0	0.0	0.0	0.0	0.0	0.0	0.0	0.0	0.0	0.0	0.0	0.0	0.0	0.0	0.0	0.0	0.0
RNF13	11342	symbol	H. sapiens	11342	H. sapiens	RNF13	ring finger protein 13	GO:0051865 protein autoubiquitination;GO:0070304 positive regulation of stress-activated protein kinase signaling cascade;GO:0070302 regulation of stress-activated protein kinase signaling cascade		Disease related genes; ENZYME proteins:Transferases; Human disease related genes:Nervous system diseases:Epilepsy; Predicted intracellular proteins; Enzymes; Potential drug targets	Nucleoplasm;Vesicles (Supported); Additional: Cytosol				0.0	0.0	0.0	0.0	0.0	0.0	0.0	0.0	0.0	0.0	0.0	0.0	0.0	0.0	0.0	0.0	0.0	0.0	0.0
AADAC	13	symbol	H. sapiens	13	H. sapiens	AADAC	arylacetamide deacetylase	GO:0010898 positive regulation of triglyceride catabolic process;GO:0010896 regulation of triglyceride catabolic process;GO:0090208 positive regulation of triglyceride metabolic process		Enzymes; Predicted intracellular proteins; ENZYME proteins:Hydrolases					0.0	0.0	0.0	0.0	0.0	0.0	0.0	0.0	0.0	0.0	0.0	0.0	0.0	0.0	0.0	0.0	0.0	0.0	0.0
PPM1L	151742	symbol	H. sapiens	151742	H. sapiens	PPM1L	protein phosphatase, Mg2+/Mn2+ dependent 1L	GO:0030148 sphingolipid biosynthetic process;GO:0046467 membrane lipid biosynthetic process;GO:0006665 sphingolipid metabolic process		Enzymes; Predicted intracellular proteins; ENZYME proteins:Hydrolases	Cytosol (Approved); Additional: Nucleoplasm				0.0	0.0	0.0	0.0	0.0	0.0	0.0	0.0	0.0	0.0	0.0	0.0	0.0	0.0	0.0	0.0	0.0	1.0	0.0
KCNMB2	10242	symbol	H. sapiens	10242	H. sapiens	KCNMB2	potassium calcium-activated channel subfamily M regulatory beta subunit 2	GO:0005513 detection of calcium ion;GO:0019228 neuronal action potential;GO:0019226 transmission of nerve impulse		Transporters:Accessory Factors Involved in Transport; FDA approved drug targets:Small molecule drugs		(2R,3R,4S,5R)-2-acetamido-3,4-dihydroxy-5-hydroxymethyl-piperidine		(M5932)HALLMARK INFLAMMATORY RESPONSE	0.0	1.0	0.0	0.0	0.0	0.0	0.0	0.0	1.0	0.0	0.0	0.0	0.0	0.0	0.0	0.0	0.0	0.0	0.0
MAP3K13	9175	symbol	H. sapiens	9175	H. sapiens	MAP3K13	mitogen-activated protein kinase kinase kinase 13	GO:1905492 positive regulation of branching morphogenesis of a nerve;GO:0014042 positive regulation of neuron maturation;GO:2000172 regulation of branching morphogenesis of a nerve	yes	ENZYME proteins:Transferases; Kinases:STE Ser/Thr protein kinases; Cancer-related genes; Predicted intracellular proteins; Enzymes	Centriolar satellite (Approved); Additional: Cytosol;Nucleoplasm	Fostamatinib			0.0	0.0	0.0	1.0	0.0	0.0	0.0	0.0	0.0	0.0	0.0	0.0	0.0	0.0	0.0	1.0	0.0	0.0	0.0
TP63	8626	symbol	H. sapiens	8626	H. sapiens	TP63	tumor protein p63	GO:0007499 ectoderm and mesoderm interaction;GO:0010481 epidermal cell division;GO:0060529 squamous basal epithelial stem cell differentiation involved in prostate gland acinus development		Disease related genes; Human disease related genes:Congenital malformations:Congenital malformations of face and neck; Transcription factors:Immunoglobulin fold; Cancer-related genes; Human disease related genes:Congenital malformations:Congenital malformations of skin; Human disease related genes:Congenital malformations:Congenital malformations of the musculoskeletal system; Human disease relat…	Nucleoplasm (Enhanced)		(M236)PID DELTA NP63 PATHWAY; (M256)PID TAP63 PATHWAY; (M19)PID P73PATHWAY	(M5939)HALLMARK P53 PATHWAY	0.0	0.0	0.0	0.0	0.0	0.0	0.0	0.0	0.0	0.0	0.0	0.0	0.0	0.0	0.0	1.0	0.0	0.0	0.0
CCDC50	152137	symbol	H. sapiens	152137	H. sapiens	CCDC50	coiled-coil domain containing 50	GO:0007605 sensory perception of sound;GO:0050954 sensory perception of mechanical stimulus;GO:0007600 sensory perception		Predicted intracellular proteins; Disease related genes; Human disease related genes:Nervous system diseases:Ear disease	Cytosol (Supported)				0.0	0.0	0.0	0.0	0.0	0.0	1.0	0.0	0.0	0.0	0.0	0.0	0.0	0.0	0.0	0.0	0.0	0.0	0.0
FGF12	2257	symbol	H. sapiens	2257	H. sapiens	FGF12	fibroblast growth factor 12	GO:0098908 regulation of neuronal action potential;GO:1905150 regulation of voltage-gated sodium channel activity;GO:0051969 regulation of transmission of nerve impulse		Predicted intracellular proteins; Disease related genes; Human disease related genes:Nervous system diseases:Epilepsy	Nucleoplasm (Approved); Additional: Cytosol		(M5883)NABA SECRETED FACTORS; (M5885)NABA MATRISOME ASSOCIATED; (M5889)NABA MATRISOME		0.0	0.0	0.0	0.0	0.0	0.0	0.0	0.0	0.0	1.0	0.0	0.0	0.0	1.0	0.0	0.0	0.0	0.0	0.0
MUC20	200958	symbol	H. sapiens	200958	H. sapiens	MUC20	mucin 20, cell surface associated	GO:0048012 hepatocyte growth factor receptor signaling pathway;GO:0007169 transmembrane receptor protein tyrosine kinase signaling pathway;GO:0007167 enzyme-linked receptor protein signaling pathway		Predicted secreted proteins; Predicted intracellular proteins	Cytosol;Nucleoplasm (Approved); Additional: Plasma membrane		(M48)PID MET PATHWAY; (M5880)NABA ECM AFFILIATED; (M5885)NABA MATRISOME ASSOCIATED		0.0	0.0	0.0	0.0	0.0	0.0	0.0	0.0	0.0	0.0	0.0	0.0	0.0	0.0	0.0	0.0	0.0	0.0	0.0
PCYT1A	5130	symbol	H. sapiens	5130	H. sapiens	PCYT1A	phosphate cytidylyltransferase 1A, choline	GO:0006657 CDP-choline pathway;GO:0006656 phosphatidylcholine biosynthetic process;GO:0046470 phosphatidylcholine metabolic process		Disease related genes; ENZYME proteins:Transferases; Human disease related genes:Congenital malformations:Congenital malformations of the musculoskeletal system; Predicted intracellular proteins; Enzymes; Potential drug targets	Nucleoplasm (Approved); Additional: Cytosol	Choline; Choline salicylate			0.0	0.0	0.0	0.0	0.0	0.0	0.0	0.0	0.0	0.0	0.0	0.0	0.0	0.0	0.0	0.0	0.0	0.0	0.0
LMLN	89782	symbol	H. sapiens	89782	H. sapiens	LMLN	leishmanolysin like peptidase	GO:0051301 cell division;GO:0007155 cell adhesion;GO:0006508 proteolysis		Predicted intracellular proteins; Enzymes; Peptidases:Metallopeptidases	Cytosol (Supported); Additional: Focal adhesion sites				0.0	0.0	0.0	0.0	0.0	0.0	0.0	0.0	0.0	0.0	0.0	0.0	0.0	0.0	0.0	0.0	0.0	0.0	0.0
KCNIP4	80333	symbol	H. sapiens	80333	H. sapiens	KCNIP4	potassium voltage-gated channel interacting protein 4	GO:1901379 regulation of potassium ion transmembrane transport;GO:0043266 regulation of potassium ion transport;GO:0071805 potassium ion transmembrane transport		Transporters:Accessory Factors Involved in Transport; Predicted intracellular proteins	Vesicles (Approved)		(M223)PID BETA CATENIN NUC PATHWAY		0.0	0.0	0.0	0.0	0.0	0.0	0.0	0.0	0.0	0.0	0.0	0.0	0.0	0.0	0.0	0.0	0.0	0.0	0.0
TLR6	10333	symbol	H. sapiens	10333	H. sapiens	TLR6	toll like receptor 6	GO:0038124 toll-like receptor TLR6:TLR2 signaling pathway;GO:0042496 detection of diacyl bacterial lipopeptide;GO:0070340 detection of bacterial lipopeptide		CD markers; Enzymes; ENZYME proteins:Hydrolases	Endoplasmic reticulum (Approved)		(M264)PID TOLL ENDOGENOUS PATHWAY	(M5950)HALLMARK ALLOGRAFT REJECTION	0.0	1.0	0.0	1.0	0.0	0.0	0.0	0.0	0.0	0.0	0.0	0.0	0.0	0.0	0.0	1.0	0.0	0.0	0.0
KLB	152831	symbol	H. sapiens	152831	H. sapiens	KLB	klotho beta	GO:0090080 positive regulation of MAPKKK cascade by fibroblast growth factor receptor signaling pathway;GO:0008543 fibroblast growth factor receptor signaling pathway;GO:0044344 cellular response to fibroblast growth factor stimulus		Transporters:Accessory Factors Involved in Transport			(M276)PID FGF PATHWAY		0.0	0.0	0.0	0.0	0.0	0.0	0.0	0.0	0.0	0.0	0.0	0.0	0.0	0.0	0.0	0.0	0.0	0.0	0.0
UGT2B17	7367	symbol	H. sapiens	7367	H. sapiens	UGT2B17	UDP glucuronosyltransferase family 2 member B17	GO:0052695 cellular glucuronidation;GO:0006063 uronic acid metabolic process;GO:0019585 glucuronate metabolic process		Enzymes; Human disease related genes:Musculoskeletal diseases:Skeletal diseases; ENZYME proteins:Transferases				(M5949)HALLMARK PEROXISOME; (M5956)HALLMARK KRAS SIGNALING DN	0.0	0.0	0.0	0.0	0.0	0.0	0.0	0.0	0.0	0.0	0.0	0.0	0.0	0.0	0.0	0.0	0.0	0.0	0.0
G3BP2	9908	symbol	H. sapiens	9908	H. sapiens	G3BP2	G3BP stress granule assembly factor 2	GO:0062029 positive regulation of stress granule assembly;GO:0062028 regulation of stress granule assembly;GO:0007253 cytoplasmic sequestering of NF-kappaB		Predicted intracellular proteins	Cytosol (Enhanced)			(M5905)HALLMARK ADIPOGENESIS	0.0	0.0	0.0	0.0	0.0	0.0	0.0	0.0	0.0	0.0	0.0	0.0	0.0	0.0	0.0	0.0	0.0	0.0	0.0
FRAS1	80144	symbol	H. sapiens	80144	H. sapiens	FRAS1	Fraser extracellular matrix complex subunit 1	GO:0003338 metanephros morphogenesis;GO:0001656 metanephros development;GO:0060993 kidney morphogenesis		Predicted intracellular proteins; Disease related genes; Human disease related genes:Congenital malformations:Other congenital malformations			(M3008)NABA ECM GLYCOPROTEINS; (M5884)NABA CORE MATRISOME; (M5889)NABA MATRISOME		0.0	0.0	0.0	0.0	1.0	0.0	0.0	0.0	0.0	0.0	0.0	0.0	0.0	0.0	0.0	0.0	0.0	0.0	0.0
GRID2	2895	symbol	H. sapiens	2895	H. sapiens	GRID2	glutamate ionotropic receptor delta type subunit 2	GO:1900454 positive regulation of long-term synaptic depression;GO:0021684 cerebellar granular layer formation;GO:0021707 cerebellar granule cell differentiation		Predicted intracellular proteins; Human disease related genes:Nervous system diseases:Neurodegenerative diseases; Disease related genes				(M5956)HALLMARK KRAS SIGNALING DN	1.0	0.0	0.0	0.0	0.0	0.0	0.0	0.0	0.0	1.0	1.0	0.0	0.0	0.0	0.0	0.0	0.0	0.0	0.0
STPG2	285555	symbol	H. sapiens	285555	H. sapiens	STPG2	sperm tail PG-rich repeat containing 2			Predicted intracellular proteins	Nucleoplasm (Approved); Additional: Nucleoli				0.0	0.0	0.0	0.0	0.0	0.0	0.0	0.0	0.0	0.0	0.0	0.0	0.0	0.0	0.0	0.0	0.0	0.0	0.0
UBE2D3	7323	symbol	H. sapiens	7323	H. sapiens	UBE2D3	ubiquitin conjugating enzyme E2 D3	GO:0070979 protein K11-linked ubiquitination;GO:1903955 positive regulation of protein targeting to mitochondrion;GO:1903749 positive regulation of establishment of protein localization to mitochondrion		Enzymes; Predicted intracellular proteins; ENZYME proteins:Transferases	Cytosol;Plasma membrane (Approved)		(M37)PID NFKAPPAB CANONICAL PATHWAY; (M258)PID BARD1 PATHWAY; (M214)PID ERBB1 INTERNALIZATION PATHWAY	(M5896)HALLMARK TGF BETA SIGNALING; (M5923)HALLMARK PI3K AKT MTOR SIGNALING; (M5924)HALLMARK MTORC1 SIGNALING	0.0	0.0	0.0	0.0	0.0	0.0	0.0	0.0	0.0	0.0	0.0	0.0	0.0	0.0	0.0	0.0	0.0	0.0	0.0
INTS12	57117	symbol	H. sapiens	57117	H. sapiens	INTS12	integrator complex subunit 12	GO:0034472 snRNA 3'-end processing;GO:0016180 snRNA processing;GO:0016073 snRNA metabolic process		Predicted intracellular proteins; Cancer-related genes:Mutated cancer genes	Cytosol;Nucleoplasm (Approved); Additional: Nuclear bodies;Plasma membrane				0.0	0.0	0.0	0.0	0.0	0.0	0.0	0.0	0.0	0.0	0.0	0.0	0.0	0.0	0.0	0.0	0.0	0.0	0.0
GSTCD	79807	symbol	H. sapiens	79807	H. sapiens	GSTCD	glutathione S-transferase C-terminal domain containing	GO:0008150 biological_process		Predicted intracellular proteins	Nucleoplasm (Supported)				0.0	0.0	0.0	0.0	0.0	0.0	0.0	0.0	0.0	0.0	0.0	0.0	0.0	0.0	0.0	0.0	0.0	0.0	0.0
DKK2	27123	symbol	H. sapiens	27123	H. sapiens	DKK2	dickkopf WNT signaling pathway inhibitor 2	GO:2000272 negative regulation of signaling receptor activity;GO:0090263 positive regulation of canonical Wnt signaling pathway;GO:0090090 negative regulation of canonical Wnt signaling pathway		Predicted secreted proteins; Predicted intracellular proteins	Golgi apparatus (Supported)		(M70)PID PS1 PATHWAY		0.0	0.0	0.0	0.0	0.0	0.0	0.0	0.0	0.0	0.0	0.0	0.0	0.0	0.0	0.0	0.0	0.0	0.0	0.0
SEC24B	10427	symbol	H. sapiens	10427	H. sapiens	SEC24B	SEC24 homolog B, COPII coat complex component	GO:1901301 regulation of cargo loading into COPII-coated vesicle;GO:0021747 cochlear nucleus development;GO:0061156 pulmonary artery morphogenesis		Predicted intracellular proteins	Nucleoplasm;Vesicles (Approved)				0.0	0.0	0.0	0.0	0.0	0.0	0.0	1.0	0.0	0.0	0.0	0.0	0.0	0.0	0.0	0.0	1.0	0.0	0.0
FAM149A	25854	symbol	H. sapiens	25854	H. sapiens	FAM149A	family with sequence similarity 149 member A			Predicted intracellular proteins	Golgi apparatus (Approved)				0.0	0.0	0.0	0.0	0.0	0.0	0.0	0.0	0.0	0.0	0.0	0.0	0.0	0.0	0.0	0.0	0.0	0.0	0.0
SEMA5A	9037	symbol	H. sapiens	9037	H. sapiens	SEMA5A	semaphorin 5A	GO:1990256 signal clustering;GO:0002043 blood vessel endothelial cell proliferation involved in sprouting angiogenesis;GO:0048842 positive regulation of axon extension involved in axon guidance		Human disease related genes:Other congenital disorders:Chromosomal abnormalities; Predicted intracellular proteins			(M5880)NABA ECM AFFILIATED; (M5885)NABA MATRISOME ASSOCIATED; (M5889)NABA MATRISOME		0.0	0.0	0.0	0.0	0.0	0.0	0.0	1.0	0.0	0.0	0.0	0.0	0.0	0.0	0.0	0.0	0.0	0.0	0.0
TAF11L11	112488746	symbol	H. sapiens	112488746	H. sapiens	TAF11L11	TATA-box binding protein associated factor 11 like 11	GO:0051123 RNA polymerase II preinitiation complex assembly;GO:0070897 transcription preinitiation complex assembly;GO:0006367 transcription initiation at RNA polymerase II promoter		Predicted intracellular proteins					0.0	0.0	0.0	0.0	0.0	0.0	0.0	0.0	0.0	0.0	0.0	0.0	0.0	0.0	0.0	0.0	0.0	0.0	0.0
TAF11L12	112488739	symbol	H. sapiens	112488739	H. sapiens	TAF11L12	TATA-box binding protein associated factor 11 like 12	GO:0051123 RNA polymerase II preinitiation complex assembly;GO:0070897 transcription preinitiation complex assembly;GO:0006367 transcription initiation at RNA polymerase II promoter		Predicted intracellular proteins					0.0	0.0	0.0	0.0	0.0	0.0	0.0	0.0	0.0	0.0	0.0	0.0	0.0	0.0	0.0	0.0	0.0	0.0	0.0
PDE4D	5144	symbol	H. sapiens	5144	H. sapiens	PDE4D	phosphodiesterase 4D	GO:0086024 adenylate cyclase-activating adrenergic receptor signaling pathway involved in positive regulation of heart rate;GO:1901898 negative regulation of relaxation of cardiac muscle;GO:0140200 adenylate cyclase-activating adrenergic receptor signaling pathway involved in regulation of heart rate		Disease related genes; ENZYME proteins:Hydrolases; FDA approved drug targets:Small molecule drugs; Human disease related genes:Congenital malformations:Congenital malformations of the musculoskeletal system; Predicted intracellular proteins; Enzymes	Plasma membrane (Supported); Additional: Cytosol	Adenosine phosphate; Dyphylline; Iloprost; Roflumilast; Piclamilast; Rolipram; 3,5-Dimethyl-1-(3-Nitrophenyl)-1h-Pyrazole-4-Carboxylic Acid Ethyl Ester; 2-[3-(2-Hydroxy-1,1-Dihydroxymethyl-Ethylamino)-Propylamino]-2-Hydroxymethyl-Propane-1,3-Diol; Zardaverine; 1-(4-Aminophenyl)-3,5-Dimethyl-1h-Pyrazole-4-Carboxylic Acid Ethyl Ester; (S)-Rolipram; Cilomilast; (R)-Rolipram; 3,5-Dimethyl-1h-Pyrazole…			0.0	0.0	0.0	0.0	0.0	0.0	0.0	0.0	0.0	0.0	0.0	1.0	0.0	0.0	0.0	0.0	0.0	0.0	0.0
ADAMTS6	11174	symbol	H. sapiens	11174	H. sapiens	ADAMTS6	ADAM metallopeptidase with thrombospondin type 1 motif 6	GO:0060976 coronary vasculature development;GO:0035904 aorta development;GO:0060840 artery development		Cancer-related genes:Candidate cancer biomarkers; Predicted secreted proteins			(M3468)NABA ECM REGULATORS; (M5885)NABA MATRISOME ASSOCIATED; (M5889)NABA MATRISOME		0.0	0.0	0.0	0.0	0.0	0.0	0.0	0.0	0.0	0.0	0.0	0.0	0.0	0.0	0.0	0.0	1.0	0.0	0.0
NAIP	4671	symbol	H. sapiens	4671	H. sapiens	NAIP	NLR family apoptosis inhibitory protein	GO:0016045 detection of bacterium;GO:0098543 detection of other organism;GO:0098581 detection of external biotic stimulus		Cancer-related genes:Candidate cancer biomarkers; Predicted intracellular proteins					0.0	1.0	0.0	0.0	0.0	0.0	0.0	0.0	0.0	0.0	0.0	0.0	0.0	0.0	0.0	0.0	0.0	0.0	0.0
DMGDH	29958	symbol	H. sapiens	29958	H. sapiens	DMGDH	dimethylglycine dehydrogenase	GO:0006579 amino-acid betaine catabolic process;GO:0042426 choline catabolic process;GO:0019695 choline metabolic process		Disease related genes; Predicted intracellular proteins; Human disease related genes:Congenital disorders of metabolism:Congenital disorders of amino acid metabolism; Enzymes; ENZYME proteins:Oxidoreductases; Potential drug targets	Mitochondria (Supported)				0.0	0.0	0.0	0.0	0.0	0.0	0.0	0.0	0.0	0.0	0.0	0.0	0.0	0.0	0.0	0.0	0.0	0.0	0.0
BHMT2	23743	symbol	H. sapiens	23743	H. sapiens	BHMT2	betaine--homocysteine S-methyltransferase 2	GO:0033477 S-methylmethionine metabolic process;GO:0071265 L-methionine biosynthetic process;GO:0043102 amino acid salvage		ENZYME proteins:Transferases; Enzymes; Predicted intracellular proteins; Cancer-related genes:Mutated cancer genes		Methionine			0.0	0.0	0.0	0.0	0.0	0.0	0.0	0.0	0.0	0.0	0.0	0.0	0.0	0.0	0.0	0.0	0.0	0.0	0.0
SLC27A6	28965	symbol	H. sapiens	28965	H. sapiens	SLC27A6	solute carrier family 27 member 6	GO:0000038 very long-chain fatty acid metabolic process;GO:0015909 long-chain fatty acid transport;GO:0015908 fatty acid transport		Predicted intracellular proteins; ENZYME proteins:Ligase; Enzymes; Transporters	Nuclear bodies (Approved)				0.0	0.0	0.0	0.0	0.0	0.0	0.0	0.0	0.0	0.0	0.0	0.0	0.0	0.0	0.0	0.0	0.0	0.0	0.0
KDM3B	51780	symbol	H. sapiens	51780	H. sapiens	KDM3B	lysine demethylase 3B	GO:0033169 histone H3-K9 demethylation;GO:0070076 histone lysine demethylation;GO:0016577 histone demethylation		Disease related genes; Predicted intracellular proteins; ENZYME proteins:Oxidoreductases; Enzymes; Potential drug targets	Nucleoplasm (Enhanced)				0.0	0.0	0.0	0.0	0.0	0.0	0.0	0.0	0.0	0.0	0.0	0.0	0.0	0.0	0.0	0.0	0.0	0.0	0.0
PCDHA1	56147	symbol	H. sapiens	56147	H. sapiens	PCDHA1	protocadherin alpha 1	GO:0007156 homophilic cell adhesion via plasma membrane adhesion molecules;GO:0098742 cell-cell adhesion via plasma-membrane adhesion molecules;GO:0098609 cell-cell adhesion		Predicted secreted proteins	Plasma membrane (Approved)				1.0	0.0	0.0	0.0	0.0	0.0	0.0	0.0	0.0	0.0	0.0	0.0	0.0	0.0	0.0	0.0	0.0	0.0	0.0
PCDHA2	56146	symbol	H. sapiens	56146	H. sapiens	PCDHA2	protocadherin alpha 2	GO:0007156 homophilic cell adhesion via plasma membrane adhesion molecules;GO:0098742 cell-cell adhesion via plasma-membrane adhesion molecules;GO:0098609 cell-cell adhesion							1.0	0.0	0.0	0.0	0.0	0.0	0.0	0.0	0.0	0.0	0.0	0.0	0.0	0.0	0.0	0.0	0.0	0.0	0.0
PCDHA3	56145	symbol	H. sapiens	56145	H. sapiens	PCDHA3	protocadherin alpha 3	GO:0007156 homophilic cell adhesion via plasma membrane adhesion molecules;GO:0098742 cell-cell adhesion via plasma-membrane adhesion molecules;GO:0098609 cell-cell adhesion							1.0	0.0	0.0	0.0	0.0	0.0	0.0	0.0	0.0	0.0	0.0	0.0	0.0	0.0	0.0	0.0	0.0	0.0	0.0
PCDHA4	56144	symbol	H. sapiens	56144	H. sapiens	PCDHA4	protocadherin alpha 4	GO:0007156 homophilic cell adhesion via plasma membrane adhesion molecules;GO:0098742 cell-cell adhesion via plasma-membrane adhesion molecules;GO:0098609 cell-cell adhesion			Nucleoplasm;Plasma membrane (Supported); Additional: Cytosol				1.0	0.0	0.0	0.0	0.0	0.0	0.0	0.0	0.0	0.0	0.0	0.0	0.0	0.0	0.0	0.0	0.0	0.0	0.0
PCDHA5	56143	symbol	H. sapiens	56143	H. sapiens	PCDHA5	protocadherin alpha 5	GO:0007156 homophilic cell adhesion via plasma membrane adhesion molecules;GO:0098742 cell-cell adhesion via plasma-membrane adhesion molecules;GO:0098609 cell-cell adhesion			Plasma membrane (Approved); Additional: Mitochondria;Nuclear speckles				1.0	0.0	0.0	0.0	0.0	0.0	0.0	0.0	0.0	0.0	0.0	0.0	0.0	0.0	0.0	0.0	0.0	0.0	0.0
PCDHA6	56142	symbol	H. sapiens	56142	H. sapiens	PCDHA6	protocadherin alpha 6	GO:0007156 homophilic cell adhesion via plasma membrane adhesion molecules;GO:0098742 cell-cell adhesion via plasma-membrane adhesion molecules;GO:0098609 cell-cell adhesion		Predicted secreted proteins	Vesicles (Approved)				1.0	0.0	0.0	0.0	0.0	0.0	0.0	0.0	0.0	0.0	0.0	0.0	0.0	0.0	0.0	0.0	0.0	0.0	0.0
PCDHA7	56141	symbol	H. sapiens	56141	H. sapiens	PCDHA7	protocadherin alpha 7	GO:0009988 cell-cell recognition;GO:0008037 cell recognition;GO:0007156 homophilic cell adhesion via plasma membrane adhesion molecules							1.0	0.0	0.0	0.0	0.0	0.0	0.0	1.0	0.0	0.0	0.0	0.0	0.0	0.0	0.0	0.0	0.0	0.0	0.0
PCDHA8	56140	symbol	H. sapiens	56140	H. sapiens	PCDHA8	protocadherin alpha 8	GO:0007156 homophilic cell adhesion via plasma membrane adhesion molecules;GO:0098742 cell-cell adhesion via plasma-membrane adhesion molecules;GO:0098609 cell-cell adhesion							1.0	0.0	0.0	0.0	0.0	0.0	0.0	0.0	0.0	0.0	0.0	0.0	0.0	0.0	0.0	0.0	0.0	0.0	0.0
PCDHA9	9752	symbol	H. sapiens	9752	H. sapiens	PCDHA9	protocadherin alpha 9	GO:0007156 homophilic cell adhesion via plasma membrane adhesion molecules;GO:0098742 cell-cell adhesion via plasma-membrane adhesion molecules;GO:0098609 cell-cell adhesion							1.0	0.0	0.0	0.0	0.0	0.0	0.0	0.0	0.0	0.0	0.0	0.0	0.0	0.0	0.0	0.0	0.0	0.0	0.0
PCDHA10	56139	symbol	H. sapiens	56139	H. sapiens	PCDHA10	protocadherin alpha 10	GO:0007156 homophilic cell adhesion via plasma membrane adhesion molecules;GO:0098742 cell-cell adhesion via plasma-membrane adhesion molecules;GO:0098609 cell-cell adhesion		Predicted secreted proteins; Predicted intracellular proteins					1.0	0.0	0.0	0.0	0.0	0.0	0.0	0.0	0.0	0.0	0.0	0.0	0.0	0.0	0.0	0.0	0.0	0.0	0.0
PCDHGA1	56114	symbol	H. sapiens	56114	H. sapiens	PCDHGA1	protocadherin gamma subfamily A, 1	GO:0007156 homophilic cell adhesion via plasma membrane adhesion molecules;GO:0098742 cell-cell adhesion via plasma-membrane adhesion molecules;GO:0098609 cell-cell adhesion			Plasma membrane;Vesicles (Uncertain); Additional: Cytosol;Nucleoplasm				1.0	0.0	0.0	0.0	0.0	0.0	0.0	0.0	0.0	0.0	0.0	0.0	0.0	0.0	0.0	0.0	0.0	0.0	0.0
PCDHGA2	56113	symbol	H. sapiens	56113	H. sapiens	PCDHGA2	protocadherin gamma subfamily A, 2	GO:0007156 homophilic cell adhesion via plasma membrane adhesion molecules;GO:0098742 cell-cell adhesion via plasma-membrane adhesion molecules;GO:0098609 cell-cell adhesion			Plasma membrane;Vesicles (Approved); Additional: Cytosol;Focal adhesion sites;Nucleoli;Nucleoplasm				1.0	0.0	0.0	0.0	0.0	0.0	0.0	0.0	0.0	0.0	0.0	0.0	0.0	0.0	0.0	0.0	0.0	0.0	0.0
PCDHGA3	56112	symbol	H. sapiens	56112	H. sapiens	PCDHGA3	protocadherin gamma subfamily A, 3	GO:0060989 lipid tube assembly involved in organelle fusion;GO:0060988 lipid tube assembly;GO:0065005 protein-lipid complex assembly			Plasma membrane;Vesicles (Uncertain); Additional: Cytosol;Nucleoplasm				1.0	0.0	0.0	0.0	0.0	0.0	0.0	0.0	0.0	0.0	0.0	0.0	0.0	0.0	0.0	0.0	0.0	0.0	0.0
PCDHGB1	56104	symbol	H. sapiens	56104	H. sapiens	PCDHGB1	protocadherin gamma subfamily B, 1	GO:0007156 homophilic cell adhesion via plasma membrane adhesion molecules;GO:0098742 cell-cell adhesion via plasma-membrane adhesion molecules;GO:0098609 cell-cell adhesion			Plasma membrane;Vesicles (Approved); Additional: Focal adhesion sites;Midbody;Nucleoplasm				1.0	0.0	0.0	0.0	0.0	0.0	0.0	0.0	0.0	0.0	0.0	0.0	0.0	0.0	0.0	0.0	0.0	0.0	0.0
PCDHGA4	56111	symbol	H. sapiens	56111	H. sapiens	PCDHGA4	protocadherin gamma subfamily A, 4	GO:0007156 homophilic cell adhesion via plasma membrane adhesion molecules;GO:0098742 cell-cell adhesion via plasma-membrane adhesion molecules;GO:0098609 cell-cell adhesion			Plasma membrane;Vesicles (Uncertain); Additional: Cytosol;Nucleoplasm				1.0	0.0	0.0	0.0	0.0	0.0	0.0	0.0	0.0	0.0	0.0	0.0	0.0	0.0	0.0	0.0	0.0	0.0	0.0
PCDHGB2	56103	symbol	H. sapiens	56103	H. sapiens	PCDHGB2	protocadherin gamma subfamily B, 2	GO:0007156 homophilic cell adhesion via plasma membrane adhesion molecules;GO:0098742 cell-cell adhesion via plasma-membrane adhesion molecules;GO:0098609 cell-cell adhesion			Cytosol;Plasma membrane;Vesicles (Supported); Additional: Nucleoplasm				1.0	0.0	0.0	0.0	0.0	0.0	0.0	0.0	0.0	0.0	0.0	0.0	0.0	0.0	0.0	0.0	0.0	0.0	0.0
PCDHGA5	56110	symbol	H. sapiens	56110	H. sapiens	PCDHGA5	protocadherin gamma subfamily A, 5	GO:0007156 homophilic cell adhesion via plasma membrane adhesion molecules;GO:0098742 cell-cell adhesion via plasma-membrane adhesion molecules;GO:0098609 cell-cell adhesion			Plasma membrane;Vesicles (Uncertain); Additional: Cytosol;Nucleoplasm				1.0	0.0	0.0	0.0	0.0	0.0	0.0	0.0	0.0	0.0	0.0	0.0	0.0	0.0	0.0	0.0	0.0	0.0	0.0
PCDHGB3	56102	symbol	H. sapiens	56102	H. sapiens	PCDHGB3	protocadherin gamma subfamily B, 3	GO:0007156 homophilic cell adhesion via plasma membrane adhesion molecules;GO:0098742 cell-cell adhesion via plasma-membrane adhesion molecules;GO:0098609 cell-cell adhesion			Plasma membrane (Approved); Additional: Cytosol;Nucleoplasm;Vesicles				1.0	0.0	0.0	0.0	0.0	0.0	0.0	0.0	0.0	0.0	0.0	0.0	0.0	0.0	0.0	0.0	0.0	0.0	0.0
PCDHGA6	56109	symbol	H. sapiens	56109	H. sapiens	PCDHGA6	protocadherin gamma subfamily A, 6	GO:0007156 homophilic cell adhesion via plasma membrane adhesion molecules;GO:0098742 cell-cell adhesion via plasma-membrane adhesion molecules;GO:0098609 cell-cell adhesion			Plasma membrane;Vesicles (Uncertain); Additional: Cytosol;Nucleoplasm				1.0	0.0	0.0	0.0	0.0	0.0	0.0	0.0	0.0	0.0	0.0	0.0	0.0	0.0	0.0	0.0	0.0	0.0	0.0
PCDHGA7	56108	symbol	H. sapiens	56108	H. sapiens	PCDHGA7	protocadherin gamma subfamily A, 7	GO:0007156 homophilic cell adhesion via plasma membrane adhesion molecules;GO:0098742 cell-cell adhesion via plasma-membrane adhesion molecules;GO:0098609 cell-cell adhesion			Plasma membrane;Vesicles (Uncertain); Additional: Cytosol;Nucleoplasm				1.0	0.0	0.0	0.0	0.0	0.0	0.0	0.0	0.0	0.0	0.0	0.0	0.0	0.0	0.0	0.0	0.0	0.0	0.0
PCDHGB4	8641	symbol	H. sapiens	8641	H. sapiens	PCDHGB4	protocadherin gamma subfamily B, 4	GO:0016339 calcium-dependent cell-cell adhesion via plasma membrane cell adhesion molecules;GO:0007156 homophilic cell adhesion via plasma membrane adhesion molecules;GO:0098742 cell-cell adhesion via plasma-membrane adhesion molecules			Plasma membrane;Vesicles (Uncertain); Additional: Cytosol;Nucleoplasm				1.0	0.0	0.0	0.0	0.0	0.0	0.0	0.0	0.0	0.0	0.0	0.0	0.0	0.0	0.0	0.0	0.0	0.0	0.0
PCDHGA8	9708	symbol	H. sapiens	9708	H. sapiens	PCDHGA8	protocadherin gamma subfamily A, 8	GO:0007156 homophilic cell adhesion via plasma membrane adhesion molecules;GO:0098742 cell-cell adhesion via plasma-membrane adhesion molecules;GO:0098609 cell-cell adhesion			Plasma membrane;Vesicles (Uncertain); Additional: Cytosol;Nucleoplasm				1.0	0.0	0.0	0.0	0.0	0.0	0.0	0.0	0.0	0.0	0.0	0.0	0.0	0.0	0.0	0.0	0.0	0.0	0.0
PCDHGB5	56101	symbol	H. sapiens	56101	H. sapiens	PCDHGB5	protocadherin gamma subfamily B, 5	GO:0007156 homophilic cell adhesion via plasma membrane adhesion molecules;GO:0098742 cell-cell adhesion via plasma-membrane adhesion molecules;GO:0098609 cell-cell adhesion			Plasma membrane;Vesicles (Uncertain); Additional: Cytosol;Nucleoplasm				1.0	0.0	0.0	0.0	0.0	0.0	0.0	0.0	0.0	0.0	0.0	0.0	0.0	0.0	0.0	0.0	0.0	0.0	0.0
PCDHGA9	56107	symbol	H. sapiens	56107	H. sapiens	PCDHGA9	protocadherin gamma subfamily A, 9	GO:0007156 homophilic cell adhesion via plasma membrane adhesion molecules;GO:0098742 cell-cell adhesion via plasma-membrane adhesion molecules;GO:0098609 cell-cell adhesion			Plasma membrane;Vesicles (Uncertain); Additional: Cytosol;Nucleoplasm				1.0	0.0	0.0	0.0	0.0	0.0	0.0	0.0	0.0	0.0	0.0	0.0	0.0	0.0	0.0	0.0	0.0	0.0	0.0
PCDHGB6	56100	symbol	H. sapiens	56100	H. sapiens	PCDHGB6	protocadherin gamma subfamily B, 6	GO:0007156 homophilic cell adhesion via plasma membrane adhesion molecules;GO:0098742 cell-cell adhesion via plasma-membrane adhesion molecules;GO:0098609 cell-cell adhesion			Plasma membrane;Vesicles (Uncertain); Additional: Cytosol;Nucleoplasm				1.0	0.0	0.0	0.0	0.0	0.0	0.0	0.0	0.0	0.0	0.0	0.0	0.0	0.0	0.0	0.0	0.0	0.0	0.0
PCDHGA10	56106	symbol	H. sapiens	56106	H. sapiens	PCDHGA10	protocadherin gamma subfamily A, 10	GO:0007156 homophilic cell adhesion via plasma membrane adhesion molecules;GO:0098742 cell-cell adhesion via plasma-membrane adhesion molecules;GO:0098609 cell-cell adhesion			Plasma membrane (Uncertain); Additional: Cytosol;Nucleoplasm;Vesicles				1.0	0.0	0.0	0.0	0.0	0.0	0.0	0.0	0.0	0.0	0.0	0.0	0.0	0.0	0.0	0.0	0.0	0.0	0.0
PCDHGB7	56099	symbol	H. sapiens	56099	H. sapiens	PCDHGB7	protocadherin gamma subfamily B, 7	GO:0007156 homophilic cell adhesion via plasma membrane adhesion molecules;GO:0098742 cell-cell adhesion via plasma-membrane adhesion molecules;GO:0098609 cell-cell adhesion			Plasma membrane;Vesicles (Uncertain); Additional: Cytosol;Nucleoplasm				1.0	0.0	0.0	0.0	0.0	0.0	0.0	0.0	0.0	0.0	0.0	0.0	0.0	0.0	0.0	0.0	0.0	0.0	0.0
PCDHGA11	56105	symbol	H. sapiens	56105	H. sapiens	PCDHGA11	protocadherin gamma subfamily A, 11	GO:0007156 homophilic cell adhesion via plasma membrane adhesion molecules;GO:0098742 cell-cell adhesion via plasma-membrane adhesion molecules;GO:0098609 cell-cell adhesion		Predicted intracellular proteins	Plasma membrane (Uncertain); Additional: Cytosol;Nucleoplasm;Vesicles				1.0	0.0	0.0	0.0	0.0	0.0	0.0	0.0	0.0	0.0	0.0	0.0	0.0	0.0	0.0	0.0	0.0	0.0	0.0
SGCD	6444	symbol	H. sapiens	6444	H. sapiens	SGCD	sarcoglycan delta	GO:0060977 coronary vasculature morphogenesis;GO:0086003 cardiac muscle cell contraction;GO:0060976 coronary vasculature development		Human disease related genes:Musculoskeletal diseases:Muscular diseases; Disease related genes; Human disease related genes:Cardiovascular diseases:Cardiac diseases				(M5909)HALLMARK MYOGENESIS; (M5930)HALLMARK EPITHELIAL MESENCHYMAL TRANSITION	0.0	0.0	0.0	0.0	0.0	0.0	0.0	0.0	0.0	0.0	0.0	0.0	0.0	1.0	0.0	0.0	1.0	0.0	0.0
IL12B	3593	symbol	H. sapiens	3593	H. sapiens	IL12B	interleukin 12B	GO:2000330 positive regulation of T-helper 17 cell lineage commitment;GO:0002860 positive regulation of natural killer cell mediated cytotoxicity directed against tumor cell target;GO:0051142 positive regulation of NK T cell proliferation		Human disease related genes:Immune system diseases:Primary immunodeficiency; Disease related genes; Predicted secreted proteins; FDA approved drug targets:Biotech drugs		5-Mercapto-2-Nitro-Benzoic Acid; Briakinumab; Ustekinumab; humanized SMART Anti-IL-12 Antibody; Tapinarof; Tildrakizumab; Risankizumab	(M36)PID IL27 PATHWAY; (M196)PID IL23 PATHWAY; (M54)PID IL12 2PATHWAY	(M5890)HALLMARK TNFA SIGNALING VIA NFKB; (M5932)HALLMARK INFLAMMATORY RESPONSE; (M5950)HALLMARK ALLOGRAFT REJECTION	0.0	0.0	0.0	0.0	0.0	0.0	0.0	0.0	0.0	0.0	0.0	1.0	1.0	0.0	1.0	0.0	0.0	0.0	0.0
TENM2	57451	symbol	H. sapiens	57451	H. sapiens	TENM2	teneurin transmembrane protein 2	GO:0051491 positive regulation of filopodium assembly;GO:0051489 regulation of filopodium assembly;GO:0007157 heterophilic cell-cell adhesion via plasma membrane cell adhesion molecules		Transporters	Nucleoli (Approved)			(M5956)HALLMARK KRAS SIGNALING DN	1.0	0.0	0.0	0.0	0.0	0.0	0.0	0.0	0.0	0.0	0.0	0.0	0.0	0.0	0.0	0.0	0.0	0.0	0.0
MSANTD5	102724657	symbol	H. sapiens	102724657	H. sapiens	MSANTD5	Myb/SANT DNA binding domain containing 5			Predicted intracellular proteins					0.0	0.0	0.0	0.0	0.0	0.0	0.0	0.0	0.0	0.0	0.0	0.0	0.0	0.0	0.0	0.0	0.0	0.0	0.0
ZFP2	80108	symbol	H. sapiens	80108	H. sapiens	ZFP2	ZFP2 zinc finger protein	GO:0006357 regulation of transcription by RNA polymerase II;GO:0006355 regulation of DNA-templated transcription;GO:1903506 regulation of nucleic acid-templated transcription		Transcription factors:Zinc-coordinating DNA-binding domains; Predicted intracellular proteins					0.0	0.0	0.0	0.0	0.0	0.0	0.0	0.0	0.0	0.0	0.0	0.0	0.0	0.0	0.0	0.0	0.0	0.0	0.0
ZNF454	285676	symbol	H. sapiens	285676	H. sapiens	ZNF454	zinc finger protein 454			Transcription factors:Zinc-coordinating DNA-binding domains; Predicted intracellular proteins					0.0	0.0	0.0	0.0	0.0	0.0	0.0	0.0	0.0	0.0	0.0	0.0	0.0	0.0	0.0	0.0	0.0	0.0	0.0
SLC22A23	63027	symbol	H. sapiens	63027	H. sapiens	SLC22A23	solute carrier family 22 member 23	GO:0006811 monoatomic ion transport;GO:0055085 transmembrane transport;GO:0006810 transport		Transporters:Electrochemical Potential-driven transporters	Nucleoplasm;Vesicles (Approved); Additional: Cytosol				0.0	0.0	0.0	0.0	0.0	0.0	0.0	0.0	0.0	0.0	0.0	0.0	0.0	0.0	0.0	0.0	0.0	0.0	0.0
FARS2	10667	symbol	H. sapiens	10667	H. sapiens	FARS2	phenylalanyl-tRNA synthetase 2, mitochondrial	GO:0006432 phenylalanyl-tRNA aminoacylation;GO:0006418 tRNA aminoacylation for protein translation;GO:0043038 amino acid activation		ENZYME proteins:Ligase; Disease related genes; Human disease related genes:Nervous system diseases:Other nervous and sensory system diseases; Predicted intracellular proteins; Enzymes; Human disease related genes:Congenital disorders of metabolism:Mitochondrial diseases; Potential drug targets		Phenylalanine			0.0	0.0	0.0	0.0	0.0	0.0	0.0	0.0	0.0	0.0	0.0	0.0	0.0	0.0	0.0	0.0	0.0	0.0	0.0
CLPSL1	340204	symbol	H. sapiens	340204	H. sapiens	CLPSL1	colipase like 1	GO:0032094 response to food;GO:0007586 digestion;GO:0016042 lipid catabolic process		Predicted secreted proteins; Predicted intracellular proteins					0.0	0.0	0.0	0.0	0.0	1.0	0.0	0.0	0.0	0.0	0.0	0.0	0.0	0.0	0.0	0.0	0.0	0.0	0.0
CLPS	1208	symbol	H. sapiens	1208	H. sapiens	CLPS	colipase	GO:0032094 response to food;GO:0007586 digestion;GO:0016042 lipid catabolic process		Predicted secreted proteins; Predicted intracellular proteins		B-nonylglucoside; (Hydroxyethyloxy)Tri(Ethyloxy)Octane; METHOXYUNDECYLPHOSPHINIC ACID		(M5956)HALLMARK KRAS SIGNALING DN	0.0	1.0	1.0	0.0	0.0	1.0	0.0	0.0	0.0	0.0	0.0	0.0	0.0	0.0	0.0	0.0	0.0	0.0	0.0
LHFPL5	222662	symbol	H. sapiens	222662	H. sapiens	LHFPL5	LHFPL tetraspan subfamily member 5	GO:0050910 detection of mechanical stimulus involved in sensory perception of sound;GO:0060088 auditory receptor cell stereocilium organization;GO:0002093 auditory receptor cell morphogenesis		Transporters:Transporter channels and pores; Potential drug targets; Disease related genes; Human disease related genes:Nervous system diseases:Ear disease	Vesicles (Approved)				0.0	1.0	0.0	0.0	0.0	0.0	1.0	1.0	0.0	0.0	0.0	0.0	0.0	0.0	0.0	0.0	0.0	0.0	0.0
LRFN2	57497	symbol	H. sapiens	57497	H. sapiens	LRFN2	leucine rich repeat and fibronectin type III domain containing 2	GO:0099175 regulation of postsynapse organization;GO:0050807 regulation of synapse organization;GO:0050803 regulation of synapse structure or activity			Plasma membrane (Supported)				0.0	0.0	0.0	0.0	0.0	0.0	0.0	0.0	1.0	1.0	0.0	0.0	0.0	0.0	0.0	0.0	0.0	0.0	0.0
MMUT	4594	symbol	H. sapiens	4594	H. sapiens	MMUT	methylmalonyl-CoA mutase	GO:0019678 propionate metabolic process, methylmalonyl pathway;GO:1901290 succinyl-CoA biosynthetic process;GO:0019541 propionate metabolic process		Disease related genes; ENZYME proteins:Isomerase; FDA approved drug targets:Small molecule drugs; Predicted intracellular proteins; Human disease related genes:Congenital disorders of metabolism:Congenital disorders of amino acid metabolism; Enzymes	Cytosol (Approved); Additional: Mitochondria	Cyanocobalamin; Hydroxocobalamin			0.0	0.0	0.0	0.0	0.0	0.0	0.0	0.0	0.0	0.0	0.0	0.0	0.0	0.0	0.0	0.0	0.0	1.0	0.0
CENPQ	55166	symbol	H. sapiens	55166	H. sapiens	CENPQ	centromere protein Q	GO:1905340 regulation of protein localization to kinetochore;GO:1905342 positive regulation of protein localization to kinetochore;GO:0051310 metaphase plate congression		Predicted intracellular proteins	Nucleoplasm (Supported)				0.0	0.0	0.0	0.0	0.0	0.0	0.0	0.0	0.0	0.0	0.0	0.0	0.0	0.0	0.0	0.0	0.0	0.0	0.0
PAQR8	85315	symbol	H. sapiens	85315	H. sapiens	PAQR8	progestin and adipoQ receptor family member 8	GO:0043401 steroid hormone mediated signaling pathway;GO:0048477 oogenesis;GO:0009755 hormone-mediated signaling pathway		Transporters:Transporter channels and pores	Plasma membrane (Supported); Additional: Golgi apparatus				0.0	0.0	0.0	0.0	0.0	0.0	0.0	0.0	0.0	0.0	0.0	0.0	0.0	0.0	0.0	0.0	0.0	0.0	0.0
KHDRBS2	202559	symbol	H. sapiens	202559	H. sapiens	KHDRBS2	KH RNA binding domain containing, signal transduction associated 2	GO:0000381 regulation of alternative mRNA splicing, via spliceosome;GO:0048024 regulation of mRNA splicing, via spliceosome;GO:0050684 regulation of mRNA processing		Predicted intracellular proteins					0.0	0.0	0.0	0.0	0.0	0.0	0.0	0.0	0.0	0.0	0.0	0.0	0.0	0.0	0.0	0.0	0.0	0.0	0.0
EYS	346007	symbol	H. sapiens	346007	H. sapiens	EYS	eyes shut homolog	GO:0050908 detection of light stimulus involved in visual perception;GO:0050962 detection of light stimulus involved in sensory perception;GO:0043403 skeletal muscle tissue regeneration		Predicted intracellular proteins; Human disease related genes:Nervous system diseases:Eye disease; Predicted secreted proteins; Disease related genes			(M3008)NABA ECM GLYCOPROTEINS; (M5884)NABA CORE MATRISOME; (M5889)NABA MATRISOME		0.0	1.0	0.0	0.0	1.0	0.0	1.0	0.0	0.0	0.0	0.0	0.0	0.0	0.0	0.0	0.0	0.0	0.0	0.0
ADGRB3	577	symbol	H. sapiens	577	H. sapiens	ADGRB3	adhesion G protein-coupled receptor B3	GO:1905806 regulation of synapse pruning;GO:0061743 motor learning;GO:0016322 neuron remodeling		G-protein coupled receptors:Family 2 (B) receptors; Transporters; G-protein coupled receptors:GPCRs excl olfactory receptors					0.0	0.0	0.0	0.0	0.0	0.0	0.0	0.0	0.0	0.0	1.0	0.0	0.0	0.0	0.0	0.0	0.0	0.0	0.0
MCHR2	84539	symbol	H. sapiens	84539	H. sapiens	MCHR2	melanin concentrating hormone receptor 2	GO:0007218 neuropeptide signaling pathway;GO:0007186 G protein-coupled receptor signaling pathway;GO:0007165 signal transduction		G-protein coupled receptors:GPCRs excl olfactory receptors					0.0	0.0	0.0	0.0	0.0	0.0	0.0	0.0	0.0	1.0	0.0	0.0	0.0	0.0	0.0	0.0	0.0	0.0	0.0
PTPRK	5796	symbol	H. sapiens	5796	H. sapiens	PTPRK	protein tyrosine phosphatase receptor type K	GO:0010839 negative regulation of keratinocyte proliferation;GO:0048041 focal adhesion assembly;GO:0034394 protein localization to cell surface		Cancer-related genes; Enzymes; Predicted intracellular proteins; ENZYME proteins:Hydrolases	Cell Junctions (Supported); Additional: Plasma membrane;Vesicles		(M60)PID NFAT TFPATHWAY		0.0	0.0	0.0	0.0	0.0	0.0	0.0	0.0	0.0	0.0	1.0	0.0	0.0	0.0	0.0	0.0	0.0	0.0	0.0
UST	10090	symbol	H. sapiens	10090	H. sapiens	UST	uronyl 2-sulfotransferase	GO:0030208 dermatan sulfate biosynthetic process;GO:0006477 protein sulfation;GO:0050651 dermatan sulfate proteoglycan biosynthetic process							0.0	0.0	0.0	0.0	0.0	0.0	0.0	0.0	0.0	0.0	0.0	0.0	0.0	0.0	0.0	0.0	0.0	0.0	0.0
SMOC2	64094	symbol	H. sapiens	64094	H. sapiens	SMOC2	SPARC related modular calcium binding 2	GO:0035470 positive regulation of vascular wound healing;GO:0045743 positive regulation of fibroblast growth factor receptor signaling pathway;GO:1900748 positive regulation of vascular endothelial growth factor signaling pathway		Predicted intracellular proteins; Predicted secreted proteins; Disease related genes; Human disease related genes:Digestive system diseases:Mouth and dental diseases			(M3008)NABA ECM GLYCOPROTEINS; (M5884)NABA CORE MATRISOME; (M5889)NABA MATRISOME		0.0	0.0	0.0	0.0	1.0	0.0	0.0	0.0	0.0	0.0	0.0	0.0	0.0	0.0	0.0	0.0	0.0	0.0	0.0
SDK1	221935	symbol	H. sapiens	221935	H. sapiens	SDK1	sidekick cell adhesion molecule 1	GO:0048148 behavioral response to cocaine;GO:0010842 retina layer formation;GO:0042220 response to cocaine		Predicted intracellular proteins	Cytosol (Approved)				1.0	0.0	0.0	0.0	0.0	0.0	0.0	0.0	0.0	0.0	1.0	0.0	0.0	0.0	0.0	0.0	0.0	0.0	0.0
DGKB	1607	symbol	H. sapiens	1607	H. sapiens	DGKB	diacylglycerol kinase beta	GO:0046834 lipid phosphorylation;GO:0046339 diacylglycerol metabolic process;GO:0007205 protein kinase C-activating G protein-coupled receptor signaling pathway	yes	Enzymes; Predicted intracellular proteins; ENZYME proteins:Transferases					0.0	0.0	0.0	0.0	0.0	0.0	0.0	0.0	0.0	0.0	0.0	0.0	0.0	0.0	0.0	0.0	0.0	0.0	0.0
RP11-507K12.1						None	None	None	None	None	None	None	None	None	nan	nan	nan	nan	nan	nan	nan	nan	nan	nan	nan	nan	nan	nan	nan	nan	nan	nan	nan
ABCB5	340273	symbol	H. sapiens	340273	H. sapiens	ABCB5	ATP binding cassette subfamily B member 5	GO:0042908 xenobiotic transport;GO:0001654 eye development;GO:0150063 visual system development		Predicted intracellular proteins; ENZYME proteins; Enzymes; Transporters:Primary Active Transporters		Biricodar; Dofequidar			0.0	0.0	0.0	0.0	0.0	0.0	0.0	0.0	0.0	0.0	0.0	0.0	0.0	0.0	0.0	0.0	0.0	0.0	0.0
BBS9	27241	symbol	H. sapiens	27241	H. sapiens	BBS9	Bardet-Biedl syndrome 9	GO:0061512 protein localization to cilium;GO:0045444 fat cell differentiation;GO:0007601 visual perception		Predicted intracellular proteins; Human disease related genes:Congenital disorders of metabolism:Other congenital disorders of metabolism; Disease related genes					0.0	0.0	0.0	0.0	0.0	0.0	0.0	0.0	0.0	0.0	0.0	0.0	0.0	0.0	0.0	0.0	0.0	0.0	0.0
EPDR1	54749	symbol	H. sapiens	54749	H. sapiens	EPDR1	ependymin related 1	GO:1990764 myofibroblast contraction;GO:0070252 actin-mediated cell contraction;GO:0030048 actin filament-based movement		Predicted secreted proteins; Predicted intracellular proteins					0.0	0.0	0.0	0.0	0.0	0.0	0.0	0.0	0.0	0.0	0.0	0.0	0.0	1.0	0.0	0.0	0.0	0.0	0.0
NME8	51314	symbol	H. sapiens	51314	H. sapiens	NME8	NME/NM23 family member 8	GO:0030317 flagellated sperm motility;GO:0097722 sperm motility;GO:0034614 cellular response to reactive oxygen species		Human disease related genes:Respiratory diseases:Tracheobronchial diseases; Predicted intracellular proteins; Disease related genes	Cytosol (Supported); Additional: Nuclear speckles				0.0	0.0	0.0	0.0	0.0	0.0	0.0	0.0	0.0	0.0	0.0	0.0	0.0	0.0	0.0	0.0	0.0	0.0	0.0
FIGNL1	63979	symbol	H. sapiens	63979	H. sapiens	FIGNL1	fidgetin like 1	GO:0033687 osteoblast proliferation;GO:0007140 male meiotic nuclear division;GO:0010569 regulation of double-strand break repair via homologous recombination		Predicted intracellular proteins					0.0	0.0	0.0	0.0	0.0	0.0	0.0	0.0	0.0	0.0	0.0	0.0	0.0	0.0	0.0	0.0	0.0	0.0	0.0
DDC	1644	symbol	H. sapiens	1644	H. sapiens	DDC	dopa decarboxylase	GO:0052314 phytoalexin metabolic process;GO:0033076 isoquinoline alkaloid metabolic process;GO:0042427 serotonin biosynthetic process		Disease related genes; ENZYME proteins:Lyases; Human disease related genes:Nervous system diseases:Other nervous and sensory system diseases; FDA approved drug targets:Small molecule drugs; Predicted intracellular proteins; Enzymes	Actin filaments (Approved)	Pyridoxal phosphate; Carbidopa; Methyldopa; Benserazide		(M5934)HALLMARK XENOBIOTIC METABOLISM	0.0	0.0	0.0	0.0	0.0	0.0	0.0	0.0	0.0	0.0	0.0	0.0	0.0	0.0	0.0	0.0	0.0	1.0	0.0
ZNF92	168374	symbol	H. sapiens	168374	H. sapiens	ZNF92	zinc finger protein 92	GO:0006357 regulation of transcription by RNA polymerase II;GO:0006355 regulation of DNA-templated transcription;GO:1903506 regulation of nucleic acid-templated transcription		Transcription factors:Zinc-coordinating DNA-binding domains; Predicted intracellular proteins	Nucleoplasm (Approved)				0.0	0.0	0.0	0.0	0.0	0.0	0.0	0.0	0.0	0.0	0.0	0.0	0.0	0.0	0.0	0.0	0.0	0.0	0.0
GRM3	2913	symbol	H. sapiens	2913	H. sapiens	GRM3	glutamate metabotropic receptor 3	GO:0007196 adenylate cyclase-inhibiting G protein-coupled glutamate receptor signaling pathway;GO:0007216 G protein-coupled glutamate receptor signaling pathway;GO:0007194 negative regulation of adenylate cyclase activity		G-protein coupled receptors:Family 3 (C) receptors; Predicted intracellular proteins; G-protein coupled receptors:GPCRs excl olfactory receptors		LY2140023			0.0	0.0	0.0	0.0	0.0	0.0	0.0	0.0	0.0	1.0	0.0	0.0	0.0	0.0	0.0	0.0	0.0	0.0	0.0
ELAPOR2	222223	symbol	H. sapiens	222223	H. sapiens	ELAPOR2	endosome-lysosome associated apoptosis and autophagy regulator family member 2	GO:0045684 positive regulation of epidermis development;GO:0030513 positive regulation of BMP signaling pathway;GO:0045682 regulation of epidermis development		Predicted intracellular proteins	Endoplasmic reticulum (Approved)				0.0	0.0	0.0	0.0	0.0	0.0	0.0	0.0	0.0	0.0	0.0	0.0	0.0	0.0	0.0	0.0	0.0	0.0	0.0
GNGT1	2792	symbol	H. sapiens	2792	H. sapiens	GNGT1	G protein subunit gamma transducin 1	GO:0010659 cardiac muscle cell apoptotic process;GO:0010658 striated muscle cell apoptotic process;GO:0010657 muscle cell apoptotic process		RAS pathway related proteins; Predicted intracellular proteins			(M204)PID RHODOPSIN PATHWAY	(M5923)HALLMARK PI3K AKT MTOR SIGNALING	0.0	1.0	0.0	0.0	0.0	0.0	1.0	0.0	1.0	0.0	0.0	0.0	0.0	0.0	0.0	0.0	0.0	0.0	0.0
ZAN	7455	symbol	H. sapiens	7455	H. sapiens	ZAN	zonadhesin	GO:0007339 binding of sperm to zona pellucida;GO:0035036 sperm-egg recognition;GO:0009988 cell-cell recognition							1.0	0.0	0.0	0.0	0.0	0.0	0.0	1.0	0.0	0.0	0.0	0.0	0.0	0.0	0.0	0.0	0.0	0.0	0.0
LHFPL3	375612	symbol	H. sapiens	375612	H. sapiens	LHFPL3	LHFPL tetraspan subfamily member 3	GO:0007605 sensory perception of sound;GO:0050954 sensory perception of mechanical stimulus;GO:0007600 sensory perception			Vesicles (Approved)				0.0	0.0	0.0	0.0	0.0	0.0	1.0	0.0	0.0	0.0	0.0	0.0	0.0	0.0	0.0	0.0	0.0	0.0	0.0
BMT2	154743	symbol	H. sapiens	154743	H. sapiens	BMT2	base methyltransferase of 25S rRNA 2 homolog	GO:1904262 negative regulation of TORC1 signaling;GO:0034198 cellular response to amino acid starvation;GO:1903432 regulation of TORC1 signaling		Predicted intracellular proteins	Cytosol (Approved)				0.0	0.0	0.0	0.0	0.0	0.0	0.0	0.0	0.0	0.0	0.0	0.0	0.0	0.0	0.0	0.0	0.0	0.0	0.0
KCND2	3751	symbol	H. sapiens	3751	H. sapiens	KCND2	potassium voltage-gated channel subfamily D member 2	GO:0045475 locomotor rhythm;GO:0019228 neuronal action potential;GO:0048512 circadian behavior		Transporters:Transporter channels and pores; Disease related genes; Voltage-gated ion channels:Voltage-Gated Potassium Channels; FDA approved drug targets:Small molecule drugs; Predicted intracellular proteins		Disopyramide; Imipramine; Dalfampridine			0.0	0.0	0.0	0.0	0.0	0.0	0.0	0.0	1.0	1.0	0.0	0.0	0.0	0.0	0.0	0.0	0.0	0.0	0.0
RBM28	55131	symbol	H. sapiens	55131	H. sapiens	RBM28	RNA binding motif protein 28	GO:0008380 RNA splicing;GO:0006397 mRNA processing;GO:0016071 mRNA metabolic process		Predicted intracellular proteins; Disease related genes; Human disease related genes:Other congenital disorders:Ribosomopathies	Nucleoli (Supported)				0.0	0.0	0.0	0.0	0.0	0.0	0.0	0.0	0.0	0.0	0.0	0.0	0.0	0.0	0.0	0.0	0.0	0.0	0.0
PRSS2	5645	symbol	H. sapiens	5645	H. sapiens	PRSS2	serine protease 2	GO:0030574 collagen catabolic process;GO:0022617 extracellular matrix disassembly;GO:0032963 collagen metabolic process		Human disease related genes:Digestive system diseases:Pancreas diseases; ENZYME proteins:Hydrolases; Predicted secreted proteins; Enzymes; Peptidases:Serine-type peptidases	Vesicles (Approved); Additional: Endoplasmic reticulum	Monoisopropylphosphorylserine; O-Benzylsulfonyl-Serine; Benzylamine; Benzamidine; Phosphorylisopropane; Phenethylamine; 3-Phenylpropylamine	(M3468)NABA ECM REGULATORS; (M5885)NABA MATRISOME ASSOCIATED; (M5889)NABA MATRISOME	(M5930)HALLMARK EPITHELIAL MESENCHYMAL TRANSITION	0.0	0.0	1.0	0.0	0.0	1.0	0.0	0.0	0.0	1.0	0.0	0.0	0.0	0.0	0.0	0.0	0.0	0.0	0.0
KMT2C	58508	symbol	H. sapiens	58508	H. sapiens	KMT2C	lysine methyltransferase 2C	GO:0097692 histone H3-K4 monomethylation;GO:0051568 histone H3-K4 methylation;GO:0034968 histone lysine methylation		Cancer-related genes:Mutational cancer driver genes; ENZYME proteins:Transferases; Disease related genes; Human disease related genes:Cancers:Cancers of haematopoietic and lymphoid tissues; Predicted intracellular proteins; Cancer-related genes:Mutated cancer genes; Human disease related genes:Congenital malformations:Other congenital malformations; Enzymes; Potential drug targets	Nucleoplasm (Approved)				0.0	0.0	0.0	0.0	0.0	0.0	0.0	0.0	0.0	0.0	0.0	0.0	0.0	0.0	0.0	0.0	0.0	0.0	0.0
ERICH1	157697	symbol	H. sapiens	157697	H. sapiens	ERICH1	glutamate rich 1			Predicted intracellular proteins	Nucleoli fibrillar center (Approved); Additional: Cytosol;Nucleoplasm				0.0	0.0	0.0	0.0	0.0	0.0	0.0	0.0	0.0	0.0	0.0	0.0	0.0	0.0	0.0	0.0	0.0	0.0	0.0
DLGAP2	9228	symbol	H. sapiens	9228	H. sapiens	DLGAP2	DLG associated protein 2	GO:0007270 neuron-neuron synaptic transmission;GO:0098962 regulation of postsynaptic neurotransmitter receptor activity;GO:0099601 regulation of neurotransmitter receptor activity		Predicted intracellular proteins; Nuclear receptors					0.0	0.0	0.0	0.0	0.0	0.0	0.0	0.0	0.0	1.0	0.0	0.0	0.0	0.0	0.0	0.0	0.0	0.0	0.0
USP17L7	392197	symbol	H. sapiens	392197	H. sapiens	USP17L7	ubiquitin specific peptidase 17 like family member 7	GO:0016579 protein deubiquitination;GO:0070646 protein modification by small protein removal;GO:0006511 ubiquitin-dependent protein catabolic process		Enzymes; Predicted intracellular proteins; Peptidases:Cysteine-type peptidases					0.0	0.0	0.0	0.0	0.0	0.0	0.0	0.0	0.0	0.0	0.0	0.0	0.0	0.0	0.0	0.0	0.0	0.0	0.0
USP17L2	377630	symbol	H. sapiens	377630	H. sapiens	USP17L2	ubiquitin specific peptidase 17 like family member 2	GO:0071586 CAAX-box protein processing;GO:0110030 regulation of G2/MI transition of meiotic cell cycle;GO:0080120 CAAX-box protein maturation		Enzymes; Predicted intracellular proteins; Peptidases:Cysteine-type peptidases; ENZYME proteins:Hydrolases					0.0	0.0	0.0	0.0	0.0	0.0	0.0	0.0	0.0	0.0	0.0	0.0	0.0	0.0	1.0	0.0	0.0	0.0	0.0
CLVS1	157807	symbol	H. sapiens	157807	H. sapiens	CLVS1	clavesin 1	GO:0007040 lysosome organization;GO:0080171 lytic vacuole organization;GO:0007033 vacuole organization		Predicted intracellular proteins				(M5951)HALLMARK SPERMATOGENESIS	0.0	0.0	0.0	0.0	0.0	0.0	0.0	0.0	0.0	0.0	0.0	0.0	0.0	0.0	0.0	0.0	0.0	0.0	0.0
RALYL	138046	symbol	H. sapiens	138046	H. sapiens	RALYL	RALY RNA binding protein like			Predicted intracellular proteins	Nucleoplasm (Enhanced)				0.0	0.0	0.0	0.0	0.0	0.0	0.0	0.0	0.0	0.0	0.0	0.0	0.0	0.0	0.0	0.0	0.0	0.0	0.0
LRRC69	100130742	symbol	H. sapiens	100130742	H. sapiens	LRRC69	leucine rich repeat containing 69			Predicted intracellular proteins	Plasma membrane (Approved)				0.0	0.0	0.0	0.0	0.0	0.0	0.0	0.0	0.0	0.0	0.0	0.0	0.0	0.0	0.0	0.0	0.0	0.0	0.0
TBC1D31	93594	symbol	H. sapiens	93594	H. sapiens	TBC1D31	TBC1 domain family member 31	GO:0060271 cilium assembly;GO:0044782 cilium organization;GO:0120031 plasma membrane bounded cell projection assembly		Predicted intracellular proteins	Centrosome (Approved)				0.0	0.0	0.0	0.0	0.0	0.0	0.0	0.0	0.0	0.0	0.0	0.0	0.0	0.0	0.0	0.0	0.0	0.0	0.0
TRAPPC9	83696	symbol	H. sapiens	83696	H. sapiens	TRAPPC9	trafficking protein particle complex subunit 9	GO:0099022 vesicle tethering;GO:0006901 vesicle coating;GO:0006903 vesicle targeting		Predicted intracellular proteins; Disease related genes; Human disease related genes:Other diseases:Mental and behavioural disorders	Golgi apparatus;Nucleoplasm;Vesicles (Approved)				0.0	0.0	0.0	1.0	0.0	0.0	0.0	0.0	0.0	0.0	0.0	0.0	0.0	0.0	0.0	0.0	0.0	0.0	0.0
SMARCA2	6595	symbol	H. sapiens	6595	H. sapiens	SMARCA2	SWI/SNF related, matrix associated, actin dependent regulator of chromatin, subfamily a, member 2	GO:2000819 regulation of nucleotide-excision repair;GO:0070316 regulation of G0 to G1 transition;GO:0045663 positive regulation of myoblast differentiation		Human disease related genes:Congenital malformations:Congenital malformations of the musculoskeletal system; Predicted intracellular proteins; Disease related genes	Nucleoplasm (Supported); Additional: Intermediate filaments;Vesicles		(M151)PID AR TF PATHWAY; (M40)PID E2F PATHWAY; (M195)PID CMYB PATHWAY		0.0	0.0	0.0	0.0	0.0	0.0	0.0	0.0	0.0	0.0	0.0	0.0	0.0	0.0	0.0	0.0	0.0	0.0	0.0
GLIS3	169792	symbol	H. sapiens	169792	H. sapiens	GLIS3	GLIS family zinc finger 3	GO:0006366 transcription by RNA polymerase II;GO:0006351 DNA-templated transcription;GO:0097659 nucleic acid-templated transcription		Predicted intracellular proteins; Transcription factors:Zinc-coordinating DNA-binding domains; Disease related genes; Human disease related genes:Endocrine and metabolic diseases:Diabetes	Nucleoplasm (Approved); Additional: Golgi apparatus				0.0	0.0	0.0	0.0	0.0	0.0	0.0	0.0	0.0	0.0	0.0	0.0	0.0	0.0	0.0	0.0	0.0	0.0	0.0
KDM4C	23081	symbol	H. sapiens	23081	H. sapiens	KDM4C	lysine demethylase 4C	GO:0033169 histone H3-K9 demethylation;GO:0070076 histone lysine demethylation;GO:0016577 histone demethylation		Enzymes; Predicted intracellular proteins; ENZYME proteins:Oxidoreductases	Nucleoplasm (Approved)		(M58)PID AR PATHWAY		0.0	0.0	0.0	0.0	0.0	0.0	0.0	0.0	0.0	0.0	0.0	0.0	0.0	0.0	0.0	0.0	0.0	0.0	0.0
FOCAD	54914	symbol	H. sapiens	54914	H. sapiens	FOCAD	focadhesin	GO:0060147 regulation of post-transcriptional gene silencing;GO:0010468 regulation of gene expression;GO:0060255 regulation of macromolecule metabolic process		Predicted intracellular proteins	Mitochondria (Uncertain)				0.0	0.0	0.0	0.0	0.0	0.0	0.0	0.0	0.0	0.0	0.0	0.0	0.0	0.0	0.0	0.0	0.0	0.0	0.0
LINGO2	158038	symbol	H. sapiens	158038	H. sapiens	LINGO2	leucine rich repeat and Ig domain containing 2								0.0	0.0	0.0	0.0	0.0	0.0	0.0	0.0	0.0	0.0	0.0	0.0	0.0	0.0	0.0	0.0	0.0	0.0	0.0
ALDH1A1	216	symbol	H. sapiens	216	H. sapiens	ALDH1A1	aldehyde dehydrogenase 1 family member A1	GO:0030392 fructosamine catabolic process;GO:0030389 fructosamine metabolic process;GO:0009449 gamma-aminobutyric acid biosynthetic process		Enzymes; Predicted intracellular proteins; ENZYME proteins:Oxidoreductases	Cytosol (Enhanced)	NADH; Vitamin A; Tretinoin; 1,4-Dithiothreitol		(M5949)HALLMARK PEROXISOME; (M5948)HALLMARK BILE ACID METABOLISM; (M5935)HALLMARK FATTY ACID METABOLISM	0.0	0.0	0.0	0.0	0.0	0.0	0.0	0.0	0.0	0.0	0.0	0.0	0.0	0.0	0.0	0.0	0.0	1.0	1.0
ROR2	4920	symbol	H. sapiens	4920	H. sapiens	ROR2	receptor tyrosine kinase like orphan receptor 2	GO:0150045 regulation of synaptic signaling by nitric oxide;GO:1900019 regulation of protein kinase C activity;GO:1900020 positive regulation of protein kinase C activity	yes	Kinases:Tyr protein kinases; Disease related genes; ENZYME proteins:Transferases; Human disease related genes:Congenital malformations:Congenital malformations of the musculoskeletal system; Human disease related genes:Congenital malformations:Other congenital malformations; Enzymes; Potential drug targets			(M77)PID WNT SIGNALING PATHWAY; (M23)PID WNT NONCANONICAL PATHWAY		0.0	0.0	0.0	0.0	0.0	0.0	0.0	0.0	0.0	1.0	0.0	0.0	0.0	0.0	0.0	1.0	0.0	0.0	0.0
CENPP	401541	symbol	H. sapiens	401541	H. sapiens	CENPP	centromere protein P	GO:0031055 chromatin remodeling at centromere;GO:0034080 CENP-A containing chromatin assembly;GO:0034508 centromere complex assembly		Predicted intracellular proteins	Nucleoplasm (Supported); Additional: Nucleoli				0.0	0.0	0.0	0.0	0.0	0.0	0.0	0.0	0.0	0.0	0.0	0.0	0.0	0.0	0.0	0.0	0.0	0.0	0.0
ECM2	1842	symbol	H. sapiens	1842	H. sapiens	ECM2	extracellular matrix protein 2	GO:0010811 positive regulation of cell-substrate adhesion;GO:0007160 cell-matrix adhesion;GO:0031589 cell-substrate adhesion		Predicted secreted proteins	Centrosome;Cytosol (Uncertain); Additional: Mitotic spindle		(M3008)NABA ECM GLYCOPROTEINS; (M5884)NABA CORE MATRISOME; (M5889)NABA MATRISOME	(M5930)HALLMARK EPITHELIAL MESENCHYMAL TRANSITION	0.0	0.0	0.0	0.0	1.0	0.0	0.0	0.0	0.0	0.0	0.0	0.0	0.0	0.0	0.0	0.0	0.0	0.0	0.0
AOPEP	84909	symbol	H. sapiens	84909	H. sapiens	AOPEP	aminopeptidase O (putative)	GO:0006508 proteolysis;GO:0019538 protein metabolic process;GO:1901564 organonitrogen compound metabolic process		Predicted intracellular proteins; Enzymes; Peptidases:Metallopeptidases	Cell Junctions (Approved)				0.0	0.0	0.0	0.0	0.0	0.0	0.0	0.0	0.0	0.0	0.0	0.0	0.0	0.0	0.0	0.0	0.0	0.0	0.0
SVEP1	79987	symbol	H. sapiens	79987	H. sapiens	SVEP1	sushi, von Willebrand factor type A, EGF and pentraxin domain containing 1	GO:0003017 lymph circulation;GO:0048014 Tie signaling pathway;GO:0045959 negative regulation of complement activation, classical pathway		Predicted intracellular proteins			(M3008)NABA ECM GLYCOPROTEINS; (M5884)NABA CORE MATRISOME; (M5889)NABA MATRISOME		0.0	0.0	0.0	0.0	1.0	0.0	0.0	0.0	0.0	0.0	1.0	0.0	0.0	0.0	0.0	0.0	0.0	0.0	0.0
KIAA1958	158405	symbol	H. sapiens	158405	H. sapiens	KIAA1958	KIAA1958			Predicted intracellular proteins	Cytosol;Plasma membrane (Approved)				0.0	0.0	0.0	0.0	0.0	0.0	0.0	0.0	0.0	0.0	0.0	0.0	0.0	0.0	0.0	0.0	0.0	0.0	0.0
PAPPA	5069	symbol	H. sapiens	5069	H. sapiens	PAPPA	pappalysin 1	GO:0032354 response to follicle-stimulating hormone;GO:0034698 response to gonadotropin;GO:0071548 response to dexamethasone		ENZYME proteins:Hydrolases; Candidate cardiovascular disease genes; Cancer-related genes:Candidate cancer biomarkers; Predicted secreted proteins; Enzymes; Peptidases:Metallopeptidases		Phenethyl Isothiocyanate	(M17200)SA B CELL RECEPTOR COMPLEXES; (M3468)NABA ECM REGULATORS; (M5885)NABA MATRISOME ASSOCIATED		0.0	0.0	0.0	0.0	0.0	0.0	0.0	0.0	0.0	0.0	0.0	0.0	0.0	0.0	0.0	0.0	0.0	0.0	0.0
HMCN2	256158	symbol	H. sapiens	256158	H. sapiens	HMCN2	hemicentin 2	GO:0007156 homophilic cell adhesion via plasma membrane adhesion molecules;GO:0007411 axon guidance;GO:0097485 neuron projection guidance		Predicted secreted proteins; Predicted intracellular proteins	Vesicles (Approved)		(M3008)NABA ECM GLYCOPROTEINS; (M5884)NABA CORE MATRISOME; (M5889)NABA MATRISOME		1.0	0.0	0.0	0.0	1.0	0.0	0.0	1.0	0.0	0.0	1.0	0.0	0.0	0.0	0.0	0.0	0.0	0.0	0.0
CEL	1056	symbol	H. sapiens	1056	H. sapiens	CEL	carboxyl ester lipase	GO:0030157 pancreatic juice secretion;GO:0030299 intestinal cholesterol absorption;GO:0098856 intestinal lipid absorption		Disease related genes; ENZYME proteins:Hydrolases; Predicted secreted proteins; Human disease related genes:Endocrine and metabolic diseases:Diabetes; Enzymes; Potential drug targets				(M5949)HALLMARK PEROXISOME; (M5935)HALLMARK FATTY ACID METABOLISM	0.0	0.0	1.0	0.0	0.0	1.0	0.0	0.0	0.0	0.0	0.0	0.0	0.0	0.0	0.0	0.0	0.0	0.0	1.0
CACNA1B	774	symbol	H. sapiens	774	H. sapiens	CACNA1B	calcium voltage-gated channel subunit alpha1 B	GO:0098703 calcium ion import across plasma membrane;GO:1904645 response to amyloid-beta;GO:0097553 calcium ion transmembrane import into cytosol		Voltage-gated ion channels:Voltage-Gated Calcium Channels; Human disease related genes:Nervous system diseases:Other nervous and sensory system diseases; Disease related genes; FDA approved drug targets:Small molecule drugs	Mitochondria (Approved)	Amlodipine; Verapamil; Levetiracetam; Seletracetam; Contulakin-G; Ziconotide; Agmatine; Benidipine; Cilnidipine		(M5949)HALLMARK PEROXISOME	0.0	0.0	0.0	0.0	0.0	0.0	0.0	0.0	1.0	1.0	0.0	0.0	0.0	0.0	0.0	0.0	0.0	0.0	0.0
KIAA1217	56243	symbol	H. sapiens	56243	H. sapiens	KIAA1217	KIAA1217	GO:0048706 embryonic skeletal system development;GO:0001501 skeletal system development;GO:0043009 chordate embryonic development		Predicted intracellular proteins	Cytosol;Nucleoplasm (Approved)				0.0	0.0	0.0	0.0	0.0	0.0	0.0	0.0	0.0	0.0	0.0	0.0	0.0	0.0	0.0	0.0	0.0	0.0	0.0
ANTXRL	195977	symbol	H. sapiens	195977	H. sapiens	ANTXRL	ANTXR like	GO:1901998 toxin transport;GO:0006810 transport;GO:0051234 establishment of localization		Predicted intracellular proteins					0.0	0.0	0.0	0.0	0.0	0.0	0.0	0.0	0.0	0.0	0.0	0.0	0.0	0.0	0.0	0.0	0.0	0.0	0.0
PCDH15	65217	symbol	H. sapiens	65217	H. sapiens	PCDH15	protocadherin related 15	GO:0050957 equilibrioception;GO:0045494 photoreceptor cell maintenance;GO:0050885 neuromuscular process controlling balance		Predicted intracellular proteins; Human disease related genes:Nervous system diseases:Eye disease; Disease related genes; Human disease related genes:Nervous system diseases:Ear disease					1.0	1.0	0.0	0.0	0.0	0.0	1.0	0.0	0.0	0.0	0.0	0.0	0.0	0.0	0.0	0.0	0.0	0.0	0.0
MTRNR2L5	100463289	symbol	H. sapiens	100463289	H. sapiens	MTRNR2L5	MT-RNR2 like 5 (pseudogene)	GO:1902109 negative regulation of mitochondrial membrane permeability involved in apoptotic process;GO:0072733 response to staurosporine;GO:0072734 cellular response to staurosporine							0.0	0.0	0.0	0.0	0.0	0.0	0.0	0.0	0.0	0.0	0.0	0.0	0.0	0.0	0.0	0.0	0.0	0.0	0.0
KCNMA1	3778	symbol	H. sapiens	3778	H. sapiens	KCNMA1	potassium calcium-activated channel subfamily M alpha 1	GO:0060083 smooth muscle contraction involved in micturition;GO:0034465 response to carbon monoxide;GO:0045794 negative regulation of cell volume		Transporters:Transporter channels and pores; Disease related genes; FDA approved drug targets:Small molecule drugs; Voltage-gated ion channels:Calcium-Activated Potassium Channels; Predicted intracellular proteins; Human disease related genes:Nervous system diseases:Epilepsy		Chlorzoxazone; Bendroflumethiazide; Procaine; Hydroflumethiazide; Hydrochlorothiazide; Miconazole; Diazoxide; Halothane; Dequalinium; Trimebutine		(M5942)HALLMARK UV RESPONSE DN	0.0	1.0	1.0	0.0	0.0	0.0	1.0	0.0	1.0	0.0	0.0	0.0	0.0	0.0	0.0	0.0	0.0	0.0	0.0
NAP1L4	4676	symbol	H. sapiens	4676	H. sapiens	NAP1L4	nucleosome assembly protein 1 like 4	GO:0006334 nucleosome assembly;GO:0034728 nucleosome organization;GO:0065004 protein-DNA complex assembly		Predicted intracellular proteins	Nucleoplasm (Supported)				0.0	0.0	0.0	0.0	0.0	0.0	0.0	0.0	0.0	0.0	0.0	0.0	0.0	0.0	0.0	0.0	0.0	0.0	0.0
ART5	116969	symbol	H. sapiens	116969	H. sapiens	ART5	ADP-ribosyltransferase 5			Enzymes; Predicted secreted proteins; Predicted intracellular proteins; ENZYME proteins:Transferases					0.0	0.0	0.0	0.0	0.0	0.0	0.0	0.0	0.0	0.0	0.0	0.0	0.0	0.0	0.0	0.0	0.0	0.0	0.0
CHRNA10	57053	symbol	H. sapiens	57053	H. sapiens	CHRNA10	cholinergic receptor nicotinic alpha 10 subunit	GO:0050910 detection of mechanical stimulus involved in sensory perception of sound;GO:0007271 synaptic transmission, cholinergic;GO:0010996 response to auditory stimulus		Transporters:Transporter channels and pores; Predicted intracellular proteins; FDA approved drug targets:Small molecule drugs		Nicotine; Succinylcholine; Butabarbital; Ethanol; Pentolinium; Trimethaphan; ATG003; Lobeline; RPI-78M; Diroximel fumarate			0.0	1.0	0.0	0.0	0.0	0.0	1.0	0.0	0.0	1.0	0.0	0.0	0.0	0.0	0.0	0.0	0.0	0.0	0.0
NUP98	4928	symbol	H. sapiens	4928	H. sapiens	NUP98	nucleoporin 98 and 96 precursor	GO:0000973 post-transcriptional tethering of RNA polymerase II gene DNA at nuclear periphery;GO:0034398 telomere tethering at nuclear periphery;GO:0000972 transcription-dependent tethering of RNA polymerase II gene DNA at nuclear periphery		Transporters:Transporter channels and pores; Cancer-related genes:Mutational cancer driver genes; Disease related genes; Predicted intracellular proteins; Potential drug targets				(M5901)HALLMARK G2M CHECKPOINT	0.0	0.0	0.0	0.0	0.0	0.0	0.0	0.0	0.0	0.0	0.0	0.0	0.0	0.0	0.0	0.0	0.0	0.0	0.0
TRIM6	117854	symbol	H. sapiens	117854	H. sapiens	TRIM6	tripartite motif containing 6	GO:0010994 free ubiquitin chain polymerization;GO:0010992 ubiquitin recycling;GO:0060340 positive regulation of type I interferon-mediated signaling pathway		Enzymes; Predicted intracellular proteins; ENZYME proteins:Transferases					0.0	0.0	0.0	1.0	0.0	0.0	0.0	0.0	0.0	0.0	0.0	0.0	0.0	0.0	1.0	0.0	0.0	0.0	0.0
TRIM6-TRIM34	445372	symbol	H. sapiens	445372	H. sapiens	TRIM6-TRIM34	TRIM6-TRIM34 readthrough			Predicted intracellular proteins	Centrosome (Uncertain); Additional: Nucleoli				0.0	0.0	0.0	0.0	0.0	0.0	0.0	0.0	0.0	0.0	0.0	0.0	0.0	0.0	0.0	0.0	0.0	0.0	0.0
TRIM34	53840	symbol	H. sapiens	53840	H. sapiens	TRIM34	tripartite motif containing 34	GO:0046596 regulation of viral entry into host cell;GO:0052372 modulation by symbiont of entry into host;GO:0043903 regulation of biological process involved in symbiotic interaction		Predicted intracellular proteins	Centrosome (Approved); Additional: Nucleoli				0.0	0.0	0.0	1.0	0.0	0.0	0.0	0.0	0.0	0.0	0.0	0.0	0.0	0.0	0.0	0.0	0.0	0.0	0.0
TRIM5	85363	symbol	H. sapiens	85363	H. sapiens	TRIM5	tripartite motif containing 5	GO:0044790 suppression of viral release by host;GO:0046597 negative regulation of viral entry into host cell;GO:1903901 negative regulation of viral life cycle		Enzymes; Predicted intracellular proteins; ENZYME proteins:Transferases	Cytosol (Supported)			(M5911)HALLMARK INTERFERON ALPHA RESPONSE	0.0	0.0	0.0	1.0	0.0	0.0	0.0	0.0	0.0	0.0	0.0	0.0	0.0	0.0	0.0	0.0	0.0	0.0	0.0
OR56B2P	390073	symbol	H. sapiens	390073	H. sapiens	OR56B2P	olfactory receptor family 56 subfamily B member 2 pseudogene	GO:0050911 detection of chemical stimulus involved in sensory perception of smell;GO:0007608 sensory perception of smell;GO:0050907 detection of chemical stimulus involved in sensory perception							0.0	1.0	0.0	0.0	0.0	0.0	0.0	0.0	0.0	0.0	0.0	0.0	0.0	0.0	0.0	0.0	0.0	0.0	0.0
OR52N5	390075	symbol	H. sapiens	390075	H. sapiens	OR52N5	olfactory receptor family 52 subfamily N member 5	GO:0050911 detection of chemical stimulus involved in sensory perception of smell;GO:0007608 sensory perception of smell;GO:0050907 detection of chemical stimulus involved in sensory perception		G-protein coupled receptors:Odorant/olfactory and gustatory receptors					0.0	1.0	0.0	0.0	0.0	0.0	0.0	0.0	0.0	0.0	0.0	0.0	0.0	0.0	0.0	0.0	0.0	0.0	0.0
OR52N1	79473	symbol	H. sapiens	79473	H. sapiens	OR52N1	olfactory receptor family 52 subfamily N member 1	GO:0050911 detection of chemical stimulus involved in sensory perception of smell;GO:0007608 sensory perception of smell;GO:0050907 detection of chemical stimulus involved in sensory perception		G-protein coupled receptors:Odorant/olfactory and gustatory receptors; Cancer-related genes:Mutated cancer genes					0.0	1.0	0.0	0.0	0.0	0.0	0.0	0.0	0.0	0.0	0.0	0.0	0.0	0.0	0.0	0.0	0.0	0.0	0.0
OR5P2	120065	symbol	H. sapiens	120065	H. sapiens	OR5P2	olfactory receptor family 5 subfamily P member 2	GO:0050911 detection of chemical stimulus involved in sensory perception of smell;GO:0007608 sensory perception of smell;GO:0050907 detection of chemical stimulus involved in sensory perception		G-protein coupled receptors:Odorant/olfactory and gustatory receptors					0.0	1.0	0.0	0.0	0.0	0.0	0.0	0.0	0.0	0.0	0.0	0.0	0.0	0.0	0.0	0.0	0.0	0.0	0.0
MRGPRX1	259249	symbol	H. sapiens	259249	H. sapiens	MRGPRX1	MAS related GPR family member X1	GO:1902349 response to chloroquine;GO:0006953 acute-phase response;GO:0002526 acute inflammatory response		G-protein coupled receptors:GPCRs excl olfactory receptors					0.0	0.0	0.0	0.0	0.0	0.0	0.0	0.0	0.0	0.0	0.0	0.0	0.0	0.0	0.0	0.0	0.0	0.0	0.0
METTL15	196074	symbol	H. sapiens	196074	H. sapiens	METTL15	methyltransferase like 15	GO:0070475 rRNA base methylation;GO:0031167 rRNA methylation;GO:0000154 rRNA modification		Predicted intracellular proteins					0.0	0.0	0.0	0.0	0.0	0.0	0.0	0.0	0.0	0.0	0.0	0.0	0.0	0.0	0.0	0.0	0.0	0.0	0.0
OR4S1	256148	symbol	H. sapiens	256148	H. sapiens	OR4S1	olfactory receptor family 4 subfamily S member 1	GO:0050911 detection of chemical stimulus involved in sensory perception of smell;GO:0007608 sensory perception of smell;GO:0050907 detection of chemical stimulus involved in sensory perception		G-protein coupled receptors:Odorant/olfactory and gustatory receptors					0.0	1.0	0.0	0.0	0.0	0.0	0.0	0.0	0.0	0.0	0.0	0.0	0.0	0.0	0.0	0.0	0.0	0.0	0.0
TRIM48	79097	symbol	H. sapiens	79097	H. sapiens	TRIM48	tripartite motif containing 48	GO:0016567 protein ubiquitination;GO:0045087 innate immune response;GO:0032446 protein modification by small protein conjugation		Predicted intracellular proteins					0.0	0.0	0.0	1.0	0.0	0.0	0.0	0.0	0.0	0.0	0.0	0.0	0.0	0.0	0.0	0.0	0.0	0.0	0.0
OR4A16	81327	symbol	H. sapiens	81327	H. sapiens	OR4A16	olfactory receptor family 4 subfamily A member 16	GO:0050911 detection of chemical stimulus involved in sensory perception of smell;GO:0007608 sensory perception of smell;GO:0050907 detection of chemical stimulus involved in sensory perception		G-protein coupled receptors:Odorant/olfactory and gustatory receptors; Cancer-related genes:Mutated cancer genes					0.0	1.0	0.0	0.0	0.0	0.0	0.0	0.0	0.0	0.0	0.0	0.0	0.0	0.0	0.0	0.0	0.0	0.0	0.0
OR4A15	81328	symbol	H. sapiens	81328	H. sapiens	OR4A15	olfactory receptor family 4 subfamily A member 15	GO:0050911 detection of chemical stimulus involved in sensory perception of smell;GO:0007608 sensory perception of smell;GO:0050907 detection of chemical stimulus involved in sensory perception							0.0	1.0	0.0	0.0	0.0	0.0	0.0	0.0	0.0	0.0	0.0	0.0	0.0	0.0	0.0	0.0	0.0	0.0	0.0
OR4C15	81309	symbol	H. sapiens	81309	H. sapiens	OR4C15	olfactory receptor family 4 subfamily C member 15	GO:0050911 detection of chemical stimulus involved in sensory perception of smell;GO:0007608 sensory perception of smell;GO:0050907 detection of chemical stimulus involved in sensory perception		G-protein coupled receptors:Odorant/olfactory and gustatory receptors					0.0	1.0	0.0	0.0	0.0	0.0	0.0	0.0	0.0	0.0	0.0	0.0	0.0	0.0	0.0	0.0	0.0	0.0	0.0
OR5D3P	8594	symbol	H. sapiens	8594	H. sapiens	OR5D3P	olfactory receptor family 5 subfamily D member 3 pseudogene								0.0	0.0	0.0	0.0	0.0	0.0	0.0	0.0	0.0	0.0	0.0	0.0	0.0	0.0	0.0	0.0	0.0	0.0	0.0
OR5D13	390142	symbol	H. sapiens	390142	H. sapiens	OR5D13	olfactory receptor family 5 subfamily D member 13	GO:0050911 detection of chemical stimulus involved in sensory perception of smell;GO:0007608 sensory perception of smell;GO:0050907 detection of chemical stimulus involved in sensory perception		G-protein coupled receptors:Odorant/olfactory and gustatory receptors					0.0	1.0	0.0	0.0	0.0	0.0	0.0	0.0	0.0	0.0	0.0	0.0	0.0	0.0	0.0	0.0	0.0	0.0	0.0
OR5D14	219436	symbol	H. sapiens	219436	H. sapiens	OR5D14	olfactory receptor family 5 subfamily D member 14	GO:0050911 detection of chemical stimulus involved in sensory perception of smell;GO:0007608 sensory perception of smell;GO:0050907 detection of chemical stimulus involved in sensory perception		G-protein coupled receptors:Odorant/olfactory and gustatory receptors					0.0	1.0	0.0	0.0	0.0	0.0	0.0	0.0	0.0	0.0	0.0	0.0	0.0	0.0	0.0	0.0	0.0	0.0	0.0
OR5L1	219437	symbol	H. sapiens	219437	H. sapiens	OR5L1	olfactory receptor family 5 subfamily L member 1	GO:0050911 detection of chemical stimulus involved in sensory perception of smell;GO:0007608 sensory perception of smell;GO:0050907 detection of chemical stimulus involved in sensory perception		G-protein coupled receptors:Odorant/olfactory and gustatory receptors					0.0	1.0	0.0	0.0	0.0	0.0	0.0	0.0	0.0	0.0	0.0	0.0	0.0	0.0	0.0	0.0	0.0	0.0	0.0
OR5D18	219438	symbol	H. sapiens	219438	H. sapiens	OR5D18	olfactory receptor family 5 subfamily D member 18	GO:0050911 detection of chemical stimulus involved in sensory perception of smell;GO:0007608 sensory perception of smell;GO:0050907 detection of chemical stimulus involved in sensory perception		G-protein coupled receptors:Odorant/olfactory and gustatory receptors					0.0	1.0	0.0	0.0	0.0	0.0	0.0	0.0	0.0	0.0	0.0	0.0	0.0	0.0	0.0	0.0	0.0	0.0	0.0
OR5L2	26338	symbol	H. sapiens	26338	H. sapiens	OR5L2	olfactory receptor family 5 subfamily L member 2	GO:0050911 detection of chemical stimulus involved in sensory perception of smell;GO:0007608 sensory perception of smell;GO:0050907 detection of chemical stimulus involved in sensory perception		G-protein coupled receptors:Odorant/olfactory and gustatory receptors					0.0	1.0	0.0	0.0	0.0	0.0	0.0	0.0	0.0	0.0	0.0	0.0	0.0	0.0	0.0	0.0	0.0	0.0	0.0
GLYATL2	219970	symbol	H. sapiens	219970	H. sapiens	GLYATL2	glycine-N-acyltransferase like 2	GO:1903964 monounsaturated fatty acid metabolic process;GO:1903965 monounsaturated fatty acid catabolic process;GO:0042758 long-chain fatty acid catabolic process		Enzymes; Predicted intracellular proteins; ENZYME proteins:Transferases	Mitochondria (Approved)	Glycine			0.0	0.0	0.0	0.0	0.0	0.0	0.0	0.0	0.0	0.0	0.0	0.0	0.0	0.0	0.0	0.0	0.0	0.0	0.0
MS4A6E	245802	symbol	H. sapiens	245802	H. sapiens	MS4A6E	membrane spanning 4-domains A6E	GO:0007166 cell surface receptor signaling pathway;GO:0007165 signal transduction;GO:0023052 signaling			Vesicles (Approved)				0.0	0.0	0.0	0.0	0.0	0.0	0.0	0.0	0.0	0.0	0.0	0.0	0.0	0.0	0.0	0.0	0.0	0.0	0.0
DLG2	1740	symbol	H. sapiens	1740	H. sapiens	DLG2	discs large MAGUK scaffold protein 2	GO:0099642 retrograde axonal protein transport;GO:0099640 axo-dendritic protein transport;GO:0099641 anterograde axonal protein transport	yes	Predicted intracellular proteins	Plasma membrane (Approved); Additional: Vesicles				0.0	0.0	0.0	0.0	0.0	0.0	0.0	0.0	1.0	1.0	0.0	0.0	0.0	0.0	0.0	0.0	0.0	0.0	0.0
GRM5	2915	symbol	H. sapiens	2915	H. sapiens	GRM5	glutamate metabotropic receptor 5	GO:0007206 phospholipase C-activating G protein-coupled glutamate receptor signaling pathway;GO:0099552 trans-synaptic signaling by lipid, modulating synaptic transmission;GO:0099553 trans-synaptic signaling by endocannabinoid, modulating synaptic transmission		Transporters; G-protein coupled receptors:GPCRs excl olfactory receptors; FDA approved drug targets:Small molecule drugs; Predicted intracellular proteins; G-protein coupled receptors:Family 3 (C) receptors		Acamprosate; ADX10059; Rufinamide; Dipraglurant			0.0	0.0	0.0	0.0	0.0	0.0	0.0	0.0	1.0	1.0	1.0	0.0	1.0	0.0	0.0	0.0	0.0	0.0	0.0
CNTN5	53942	symbol	H. sapiens	53942	H. sapiens	CNTN5	contactin 5	GO:0099054 presynapse assembly;GO:0099172 presynapse organization;GO:0007416 synapse assembly		Predicted intracellular proteins					1.0	0.0	0.0	0.0	0.0	0.0	1.0	1.0	0.0	0.0	1.0	0.0	0.0	0.0	0.0	0.0	0.0	0.0	0.0
C11orf65	160140	symbol	H. sapiens	160140	H. sapiens	C11orf65	chromosome 11 open reading frame 65	GO:0090258 negative regulation of mitochondrial fission;GO:1903215 negative regulation of protein targeting to mitochondrion;GO:1903748 negative regulation of establishment of protein localization to mitochondrion		Predicted intracellular proteins					0.0	0.0	0.0	0.0	0.0	0.0	0.0	0.0	0.0	0.0	0.0	0.0	0.0	0.0	0.0	0.0	0.0	0.0	0.0
ERC1	23085	symbol	H. sapiens	23085	H. sapiens	ERC1	ELKS/RAB6-interacting/CAST family member 1	GO:0048790 maintenance of presynaptic active zone structure;GO:1990709 presynaptic active zone organization;GO:0007252 I-kappaB phosphorylation		Predicted intracellular proteins; Cancer-related genes; Disease related genes	Cytosol (Supported); Additional: Plasma membrane;Vesicles		(M37)PID NFKAPPAB CANONICAL PATHWAY; (M110)PID IL1 PATHWAY		0.0	0.0	0.0	1.0	0.0	0.0	0.0	0.0	0.0	1.0	1.0	0.0	0.0	0.0	0.0	0.0	0.0	0.0	0.0
PRH1	5554	symbol	H. sapiens	5554	H. sapiens	PRH1	proline rich protein HaeIII subfamily 1			Predicted intracellular proteins					0.0	0.0	1.0	0.0	0.0	0.0	0.0	0.0	0.0	0.0	0.0	0.0	0.0	0.0	0.0	0.0	0.0	0.0	0.0
TAS2R43	259289	symbol	H. sapiens	259289	H. sapiens	TAS2R43	taste 2 receptor member 43	GO:0001580 detection of chemical stimulus involved in sensory perception of bitter taste;GO:0050913 sensory perception of bitter taste;GO:0050912 detection of chemical stimulus involved in sensory perception of taste		G-protein coupled receptors:Family T2R receptors (taste receptor GPCRs); G-protein coupled receptors:GPCRs excl olfactory receptors					0.0	1.0	0.0	0.0	0.0	0.0	0.0	0.0	0.0	1.0	0.0	0.0	0.0	0.0	0.0	0.0	0.0	0.0	0.0
RERG	85004	symbol	H. sapiens	85004	H. sapiens	RERG	RAS like estrogen regulated growth inhibitor	GO:0030308 negative regulation of cell growth;GO:0007264 small GTPase mediated signal transduction;GO:0045926 negative regulation of growth		Enzymes; Predicted intracellular proteins; ENZYME proteins:Hydrolases	Cytosol;Nucleoplasm (Approved); Additional: Nucleoli fibrillar center				0.0	0.0	0.0	0.0	0.0	0.0	0.0	0.0	0.0	0.0	0.0	0.0	0.0	0.0	0.0	0.0	0.0	0.0	0.0
FREM2	341640	symbol	H. sapiens	341640	H. sapiens	FREM2	FRAS1 related extracellular matrix 2	GO:0042733 embryonic digit morphogenesis;GO:0030326 embryonic limb morphogenesis;GO:0035113 embryonic appendage morphogenesis		Disease related genes; Human disease related genes:Congenital malformations:Other congenital malformations	Cytosol (Approved)		(M5880)NABA ECM AFFILIATED; (M5885)NABA MATRISOME ASSOCIATED; (M5889)NABA MATRISOME		0.0	0.0	0.0	0.0	0.0	0.0	0.0	0.0	0.0	0.0	0.0	0.0	0.0	0.0	0.0	0.0	0.0	0.0	0.0
TBC1D4	9882	symbol	H. sapiens	9882	H. sapiens	TBC1D4	TBC1 domain family member 4	GO:0031339 negative regulation of vesicle fusion;GO:0031338 regulation of vesicle fusion;GO:0090630 activation of GTPase activity		Predicted intracellular proteins; Transporters:Accessory Factors Involved in Transport; Disease related genes; Potential drug targets	Cytosol (Enhanced)		(M247)PID INSULIN GLUCOSE PATHWAY; (M249)PID PI3KCI AKT PATHWAY		0.0	0.0	0.0	0.0	0.0	0.0	0.0	0.0	0.0	0.0	0.0	0.0	0.0	0.0	0.0	0.0	0.0	0.0	0.0
OBI1	79596	symbol	H. sapiens	79596	H. sapiens	OBI1	ORC ubiquitin ligase 1	GO:0051865 protein autoubiquitination;GO:0006513 protein monoubiquitination;GO:0006275 regulation of DNA replication		Enzymes; Predicted intracellular proteins; ENZYME proteins:Transferases	Nuclear bodies;Nucleoplasm (Approved); Additional: Cytosol				0.0	0.0	0.0	0.0	0.0	0.0	0.0	0.0	0.0	0.0	0.0	0.0	0.0	0.0	0.0	0.0	0.0	0.0	0.0
PRORP	9692	symbol	H. sapiens	9692	H. sapiens	PRORP	protein only RNase P catalytic subunit	GO:0097745 mitochondrial tRNA 5'-end processing;GO:0000964 mitochondrial RNA 5'-end processing;GO:0090646 mitochondrial tRNA processing		Enzymes; Predicted intracellular proteins; ENZYME proteins:Hydrolases	Mitochondria (Supported); Additional: Nucleoplasm				0.0	0.0	0.0	0.0	0.0	0.0	0.0	0.0	0.0	0.0	0.0	0.0	0.0	0.0	0.0	0.0	0.0	0.0	0.0
RBM25	58517	symbol	H. sapiens	58517	H. sapiens	RBM25	RNA binding motif protein 25	GO:0000381 regulation of alternative mRNA splicing, via spliceosome;GO:0048024 regulation of mRNA splicing, via spliceosome;GO:0050684 regulation of mRNA processing		Predicted intracellular proteins	Nuclear speckles (Enhanced)				0.0	0.0	0.0	0.0	0.0	0.0	0.0	0.0	0.0	0.0	0.0	0.0	0.0	0.0	0.0	0.0	0.0	0.0	0.0
MIDEAS	91748	symbol	H. sapiens	91748	H. sapiens	MIDEAS	mitotic deacetylase associated SANT domain protein	GO:0016575 histone deacetylation;GO:0006476 protein deacetylation;GO:0035601 protein deacylation		Predicted intracellular proteins; Transcription factors:Helix-turn-helix domains	Nucleoplasm (Enhanced)				0.0	0.0	0.0	0.0	0.0	0.0	0.0	0.0	0.0	0.0	0.0	0.0	0.0	0.0	0.0	0.0	0.0	0.0	0.0
NRXN3	9369	symbol	H. sapiens	9369	H. sapiens	NRXN3	neurexin 3	GO:0007158 neuron cell-cell adhesion;GO:0071625 vocalization behavior;GO:0035176 social behavior		Predicted intracellular proteins					1.0	0.0	0.0	0.0	0.0	0.0	0.0	1.0	1.0	0.0	0.0	0.0	0.0	0.0	0.0	0.0	0.0	0.0	0.0
TMEM179	388021	symbol	H. sapiens	388021	H. sapiens	TMEM179	transmembrane protein 179			Predicted intracellular proteins; Transporters	Mitochondria (Uncertain)				0.0	0.0	0.0	0.0	0.0	0.0	0.0	0.0	0.0	0.0	0.0	0.0	0.0	0.0	0.0	0.0	0.0	0.0	0.0
OTUD7A	161725	symbol	H. sapiens	161725	H. sapiens	OTUD7A	OTU deubiquitinase 7A	GO:0071947 protein deubiquitination involved in ubiquitin-dependent protein catabolic process;GO:0035871 protein K11-linked deubiquitination;GO:0071108 protein K48-linked deubiquitination		ENZYME proteins:Hydrolases; Peptidases:Cysteine-type peptidases; Predicted intracellular proteins; Cancer-related genes:Mutated cancer genes; Enzymes	Cytosol (Approved); Additional: Nucleoli				0.0	0.0	0.0	0.0	0.0	0.0	0.0	0.0	0.0	0.0	0.0	0.0	0.0	0.0	0.0	0.0	0.0	0.0	0.0
SLC28A2	9153	symbol	H. sapiens	9153	H. sapiens	SLC28A2	solute carrier family 28 member 2	GO:0035340 inosine transport;GO:0032238 adenosine transport;GO:0015860 purine nucleoside transmembrane transport		Transporters:Electrochemical Potential-driven transporters	Vesicles (Approved); Additional: Golgi apparatus			(M5932)HALLMARK INFLAMMATORY RESPONSE	0.0	0.0	0.0	0.0	0.0	0.0	0.0	0.0	0.0	0.0	0.0	0.0	0.0	0.0	0.0	0.0	0.0	0.0	0.0
CYP19A1	1588	symbol	H. sapiens	1588	H. sapiens	CYP19A1	cytochrome P450 family 19 subfamily A member 1	GO:2000866 positive regulation of estradiol secretion;GO:2000864 regulation of estradiol secretion;GO:0002677 negative regulation of chronic inflammatory response		Disease related genes; Cancer-related genes:Candidate cancer biomarkers; FDA approved drug targets:Small molecule drugs; Human disease related genes:Endocrine and metabolic diseases:Gonadal diseases; Predicted intracellular proteins; ENZYME proteins:Oxidoreductases; Enzymes	Mitochondria (Uncertain)	Nicotine; Aminoglutethimide; Estrone; Testolactone; Exemestane; Letrozole; Anastrozole; 2-Methoxyestradiol; Naringenin; Glyphosate; MPI-674			0.0	0.0	0.0	0.0	0.0	0.0	0.0	0.0	0.0	0.0	0.0	0.0	0.0	0.0	0.0	1.0	0.0	0.0	1.0
GLDN	342035	symbol	H. sapiens	342035	H. sapiens	GLDN	gliomedin	GO:0045162 clustering of voltage-gated sodium channels;GO:0045161 neuronal ion channel clustering;GO:0032528 microvillus organization		Human disease related genes:Congenital malformations:Congenital malformations of the musculoskeletal system; Predicted intracellular proteins; Predicted secreted proteins; Disease related genes	Plasma membrane;Vesicles (Supported)		(M3008)NABA ECM GLYCOPROTEINS; (M5884)NABA CORE MATRISOME; (M5889)NABA MATRISOME		1.0	0.0	0.0	0.0	1.0	0.0	0.0	0.0	0.0	0.0	0.0	0.0	0.0	0.0	0.0	0.0	0.0	0.0	0.0
DMXL2	23312	symbol	H. sapiens	23312	H. sapiens	DMXL2	Dmx like 2	GO:0007035 vacuolar acidification;GO:0051452 intracellular pH reduction;GO:0051453 regulation of intracellular pH		Disease related genes; Human disease related genes:Nervous system diseases:Epilepsy; Human disease related genes:Nervous system diseases:Ear disease; Transporters:Accessory Factors Involved in Transport; Potential drug targets					0.0	0.0	0.0	0.0	0.0	0.0	0.0	0.0	0.0	0.0	0.0	0.0	0.0	0.0	0.0	0.0	0.0	0.0	0.0
ALDH1A2	8854	symbol	H. sapiens	8854	H. sapiens	ALDH1A2	aldehyde dehydrogenase 1 family member A2	GO:0090242 retinoic acid receptor signaling pathway involved in somitogenesis;GO:0042904 9-cis-retinoic acid biosynthetic process;GO:0042905 9-cis-retinoic acid metabolic process		Enzymes; Predicted intracellular proteins; ENZYME proteins:Oxidoreductases		NADH; Vitamin A; Tretinoin		(M5953)HALLMARK KRAS SIGNALING UP	0.0	0.0	0.0	0.0	0.0	0.0	0.0	0.0	0.0	0.0	0.0	0.0	0.0	0.0	0.0	0.0	0.0	0.0	1.0
EFL1	79631	symbol	H. sapiens	79631	H. sapiens	EFL1	elongation factor like GTPase 1	GO:0042256 cytosolic ribosome assembly;GO:0046039 GTP metabolic process;GO:0006414 translational elongation		Predicted intracellular proteins; Disease related genes; Human disease related genes:Other congenital disorders:Ribosomopathies	Cytosol (Approved)	S-(Methylmercury)-L-Cysteine; Deoxycholic acid; Guanosine-5'-Diphosphate			0.0	0.0	0.0	0.0	0.0	0.0	0.0	0.0	0.0	0.0	0.0	0.0	0.0	0.0	0.0	0.0	0.0	0.0	0.0
GOLGA6L4	643707	symbol	H. sapiens	643707	H. sapiens	GOLGA6L4	golgin A6 family like 4			Predicted intracellular proteins					0.0	0.0	0.0	0.0	0.0	0.0	0.0	0.0	0.0	0.0	0.0	0.0	0.0	0.0	0.0	0.0	0.0	0.0	0.0
LRRK1	79705	symbol	H. sapiens	79705	H. sapiens	LRRK1	leucine rich repeat kinase 1	GO:0036035 osteoclast development;GO:0045453 bone resorption;GO:0098751 bone cell development	yes	Enzymes; Kinases:TKL Ser/Thr protein kinases; Predicted intracellular proteins; ENZYME proteins:Transferases	Cytosol (Supported); Additional: Mitochondria				0.0	0.0	0.0	0.0	0.0	0.0	0.0	0.0	0.0	0.0	0.0	0.0	1.0	0.0	0.0	0.0	0.0	0.0	0.0
PDXDC1	23042	symbol	H. sapiens	23042	H. sapiens	PDXDC1	pyridoxal dependent decarboxylase domain containing 1	GO:0019752 carboxylic acid metabolic process;GO:0043436 oxoacid metabolic process;GO:0006082 organic acid metabolic process		Predicted intracellular proteins	Golgi apparatus;Vesicles (Enhanced)				0.0	0.0	0.0	0.0	0.0	0.0	0.0	0.0	0.0	0.0	0.0	0.0	0.0	0.0	0.0	0.0	0.0	0.0	0.0
XYLT1	64131	symbol	H. sapiens	64131	H. sapiens	XYLT1	xylosyltransferase 1	GO:0043931 ossification involved in bone maturation;GO:0030206 chondroitin sulfate biosynthetic process;GO:0070977 bone maturation		Disease related genes; ENZYME proteins:Transferases; Human disease related genes:Congenital malformations:Congenital malformations of skin; Predicted secreted proteins; Human disease related genes:Congenital malformations:Congenital malformations of the musculoskeletal system; Enzymes; Potential drug targets	Plasma membrane (Approved); Additional: Endoplasmic reticulum				0.0	0.0	0.0	0.0	0.0	0.0	0.0	0.0	0.0	0.0	0.0	0.0	0.0	0.0	0.0	0.0	0.0	0.0	0.0
PDPR	55066	symbol	H. sapiens	55066	H. sapiens	PDPR	pyruvate dehydrogenase phosphatase regulatory subunit	GO:1904184 positive regulation of pyruvate dehydrogenase activity;GO:1904182 regulation of pyruvate dehydrogenase activity;GO:0051353 positive regulation of oxidoreductase activity		Predicted intracellular proteins	Mitochondria (Approved)				0.0	0.0	0.0	0.0	0.0	0.0	0.0	0.0	0.0	0.0	0.0	0.0	0.0	0.0	0.0	0.0	0.0	0.0	0.0
PSMD7	5713	symbol	H. sapiens	5713	H. sapiens	PSMD7	proteasome 26S subunit, non-ATPase 7	GO:0043161 proteasome-mediated ubiquitin-dependent protein catabolic process;GO:0010498 proteasomal protein catabolic process;GO:0006511 ubiquitin-dependent protein catabolic process		Predicted intracellular proteins; Enzymes; Peptidases:Metallopeptidases	Nucleoplasm (Enhanced)			(M5926)HALLMARK MYC TARGETS V1	0.0	0.0	0.0	0.0	0.0	0.0	0.0	0.0	0.0	0.0	0.0	0.0	0.0	0.0	0.0	0.0	0.0	0.0	0.0
MON1B	22879	symbol	H. sapiens	22879	H. sapiens	MON1B	MON1 homolog B, secretory trafficking associated	GO:0019085 early viral transcription;GO:0019086 late viral transcription;GO:0019083 viral transcription		Predicted intracellular proteins	Cytosol (Approved)				0.0	0.0	0.0	0.0	0.0	0.0	0.0	0.0	0.0	0.0	0.0	0.0	0.0	0.0	0.0	0.0	0.0	0.0	0.0
WWOX	51741	symbol	H. sapiens	51741	H. sapiens	WWOX	WW domain containing oxidoreductase	GO:2001241 positive regulation of extrinsic apoptotic signaling pathway in absence of ligand;GO:2001239 regulation of extrinsic apoptotic signaling pathway in absence of ligand;GO:2001238 positive regulation of extrinsic apoptotic signaling pathway		Predicted intracellular proteins; Human disease related genes:Nervous system diseases:Neurodegenerative diseases; Disease related genes; Human disease related genes:Nervous system diseases:Epilepsy	Golgi apparatus (Supported); Additional: Cytosol		(M13)PID ERBB4 PATHWAY; (M19)PID P73PATHWAY		0.0	0.0	0.0	0.0	0.0	0.0	0.0	0.0	0.0	0.0	0.0	0.0	0.0	0.0	0.0	0.0	0.0	0.0	0.0
AIPL1	23746	symbol	H. sapiens	23746	H. sapiens	AIPL1	aryl hydrocarbon receptor interacting protein like 1	GO:0018343 protein farnesylation;GO:0022400 regulation of rhodopsin mediated signaling pathway;GO:0018342 protein prenylation		Predicted intracellular proteins; Human disease related genes:Nervous system diseases:Eye disease; Disease related genes	Nucleoplasm (Supported); Additional: Cytosol;Nuclear speckles				0.0	1.0	0.0	0.0	0.0	0.0	1.0	0.0	0.0	0.0	0.0	0.0	0.0	0.0	0.0	0.0	0.0	0.0	0.0
EVPLL	645027	symbol	H. sapiens	645027	H. sapiens	EVPLL	envoplakin like			Predicted intracellular proteins	Nuclear bodies;Nucleoplasm (Approved)				0.0	0.0	0.0	0.0	0.0	0.0	0.0	0.0	0.0	0.0	0.0	0.0	0.0	0.0	0.0	0.0	0.0	0.0	0.0
ANKFN1	162282	symbol	H. sapiens	162282	H. sapiens	ANKFN1	ankyrin repeat and fibronectin type III domain containing 1	GO:0061172 regulation of establishment of bipolar cell polarity;GO:2000114 regulation of establishment of cell polarity;GO:0032878 regulation of establishment or maintenance of cell polarity		Predicted intracellular proteins	Nucleoplasm (Approved); Additional: Plasma membrane				0.0	0.0	0.0	0.0	0.0	0.0	0.0	0.0	0.0	0.0	0.0	0.0	0.0	0.0	0.0	0.0	0.0	0.0	0.0
GH2	2689	symbol	H. sapiens	2689	H. sapiens	GH2	growth hormone 2	GO:0060396 growth hormone receptor signaling pathway;GO:0071378 cellular response to growth hormone stimulus;GO:0060416 response to growth hormone		Cancer-related genes:Candidate cancer biomarkers; Predicted secreted proteins			(M5883)NABA SECRETED FACTORS; (M5885)NABA MATRISOME ASSOCIATED; (M5889)NABA MATRISOME		0.0	0.0	0.0	0.0	0.0	0.0	0.0	0.0	0.0	1.0	0.0	0.0	1.0	0.0	0.0	0.0	0.0	0.0	0.0
CSH1	1442	symbol	H. sapiens	1442	H. sapiens	CSH1	chorionic somatomammotropin hormone 1	GO:0060396 growth hormone receptor signaling pathway;GO:0071378 cellular response to growth hormone stimulus;GO:0060416 response to growth hormone		Predicted secreted proteins; Predicted intracellular proteins			(M5883)NABA SECRETED FACTORS; (M5885)NABA MATRISOME ASSOCIATED; (M5889)NABA MATRISOME		0.0	0.0	0.0	0.0	0.0	0.0	0.0	0.0	0.0	1.0	0.0	0.0	1.0	0.0	0.0	0.0	0.0	0.0	0.0
TEX19	400629	symbol	H. sapiens	400629	H. sapiens	TEX19	testis expressed 19	GO:0010528 regulation of transposition;GO:0010529 negative regulation of transposition;GO:0007140 male meiotic nuclear division		Predicted intracellular proteins					0.0	0.0	0.0	0.0	0.0	0.0	0.0	0.0	0.0	0.0	0.0	0.0	0.0	0.0	0.0	0.0	0.0	0.0	0.0
SPIRE1	56907	symbol	H. sapiens	56907	H. sapiens	SPIRE1	spire type actin nucleation factor 1	GO:0070649 formin-nucleated actin cable assembly;GO:0110009 formin-nucleated actin cable organization;GO:0040038 polar body extrusion after meiotic divisions		Predicted intracellular proteins	Cytosol;Nucleoplasm (Approved)				0.0	0.0	0.0	0.0	0.0	0.0	0.0	0.0	0.0	0.0	0.0	0.0	0.0	0.0	0.0	0.0	0.0	0.0	0.0
ROCK1	6093	symbol	H. sapiens	6093	H. sapiens	ROCK1	Rho associated coiled-coil containing protein kinase 1	GO:0110061 regulation of angiotensin-activated signaling pathway;GO:0003383 apical constriction;GO:0035509 negative regulation of myosin-light-chain-phosphatase activity	yes	ENZYME proteins:Transferases; FDA approved drug targets:Small molecule drugs; Predicted intracellular proteins; Kinases:AGC Ser/Thr protein kinases; Enzymes		Hydroxyfasudil; (S)-2-METHYL-1-[(4-METHYL-5-ISOQUINOLINE)SULFONYL]-HOMOPIPERAZINE; Fasudil; Y-27632; Ripasudil; Netarsudil	(M138)PID THROMBIN PAR4 PATHWAY; (M11)PID PRL SIGNALING EVENTS PATHWAY; (M23)PID WNT NONCANONICAL PATHWAY	(M5902)HALLMARK APOPTOSIS; (M5893)HALLMARK MITOTIC SPINDLE	1.0	0.0	0.0	0.0	0.0	0.0	0.0	1.0	0.0	0.0	0.0	0.0	0.0	1.0	0.0	0.0	0.0	0.0	0.0
SERPINB11	89778	symbol	H. sapiens	89778	H. sapiens	SERPINB11	serpin family B member 11	GO:0010951 negative regulation of endopeptidase activity;GO:0010466 negative regulation of peptidase activity;GO:0045861 negative regulation of proteolysis		Predicted intracellular proteins			(M3468)NABA ECM REGULATORS; (M5885)NABA MATRISOME ASSOCIATED; (M5889)NABA MATRISOME		0.0	0.0	0.0	0.0	0.0	0.0	0.0	0.0	0.0	0.0	0.0	0.0	0.0	0.0	0.0	0.0	0.0	0.0	0.0
ANKRD24	170961	symbol	H. sapiens	170961	H. sapiens	ANKRD24	ankyrin repeat domain 24			Predicted intracellular proteins	Cytosol;Microtubules (Uncertain)				0.0	0.0	0.0	0.0	0.0	0.0	0.0	0.0	0.0	0.0	0.0	0.0	0.0	0.0	0.0	0.0	0.0	0.0	0.0
OR7D2	162998	symbol	H. sapiens	162998	H. sapiens	OR7D2	olfactory receptor family 7 subfamily D member 2	GO:0050911 detection of chemical stimulus involved in sensory perception of smell;GO:0007608 sensory perception of smell;GO:0050907 detection of chemical stimulus involved in sensory perception		G-protein coupled receptors:Odorant/olfactory and gustatory receptors					0.0	1.0	0.0	0.0	0.0	0.0	0.0	0.0	0.0	0.0	0.0	0.0	0.0	0.0	0.0	0.0	0.0	0.0	0.0
CYP4F11	57834	symbol	H. sapiens	57834	H. sapiens	CYP4F11	cytochrome P450 family 4 subfamily F member 11	GO:0031407 oxylipin metabolic process;GO:0031408 oxylipin biosynthetic process;GO:0042361 menaquinone catabolic process		Enzymes; Predicted intracellular proteins; ENZYME proteins:Oxidoreductases				(M5907)HALLMARK ESTROGEN RESPONSE LATE	0.0	0.0	0.0	0.0	0.0	0.0	0.0	0.0	0.0	0.0	0.0	0.0	0.0	0.0	0.0	0.0	0.0	0.0	1.0
RAB3A	5864	symbol	H. sapiens	5864	H. sapiens	RAB3A	RAB3A, member RAS oncogene family	GO:0061670 evoked neurotransmitter secretion;GO:0099161 regulation of presynaptic dense core granule exocytosis;GO:1905413 regulation of dense core granule exocytosis		Predicted intracellular proteins	Nucleoplasm (Approved); Additional: Centrosome;Cytosol				0.0	1.0	0.0	0.0	0.0	0.0	1.0	1.0	1.0	1.0	1.0	0.0	0.0	0.0	0.0	0.0	0.0	0.0	0.0
PSG8	440533	symbol	H. sapiens	440533	H. sapiens	PSG8	pregnancy specific beta-1-glycoprotein 8	GO:0002682 regulation of immune system process;GO:0007165 signal transduction;GO:0023052 signaling		Predicted secreted proteins; Predicted intracellular proteins					0.0	0.0	0.0	0.0	0.0	0.0	0.0	0.0	0.0	0.0	0.0	0.0	0.0	0.0	0.0	0.0	0.0	0.0	0.0
PSG1	5669	symbol	H. sapiens	5669	H. sapiens	PSG1	pregnancy specific beta-1-glycoprotein 1	GO:0007565 female pregnancy;GO:0044703 multi-organism reproductive process;GO:0044706 multi-multicellular organism process		CD markers; Predicted secreted proteins; Predicted intracellular proteins					0.0	0.0	0.0	0.0	0.0	0.0	0.0	0.0	0.0	0.0	0.0	0.0	0.0	0.0	0.0	0.0	0.0	0.0	0.0
SIGLEC5	8778	symbol	H. sapiens	8778	H. sapiens	SIGLEC5	sialic acid binding Ig like lectin 5	GO:0007155 cell adhesion;GO:0009987 cellular process;GO:0008150 biological_process							0.0	0.0	0.0	0.0	0.0	0.0	0.0	0.0	0.0	0.0	0.0	0.0	0.0	0.0	0.0	0.0	0.0	0.0	0.0
SIGLEC14	100049587	symbol	H. sapiens	100049587	H. sapiens	SIGLEC14	sialic acid binding Ig like lectin 14	GO:0007155 cell adhesion;GO:0009987 cellular process;GO:0008150 biological_process			Vesicles (Uncertain); Additional: Plasma membrane				0.0	0.0	0.0	0.0	0.0	0.0	0.0	0.0	0.0	0.0	0.0	0.0	0.0	0.0	0.0	0.0	0.0	0.0	0.0
ERVV-1	147664	symbol	H. sapiens	147664	H. sapiens	ERVV-1	endogenous retrovirus group V member 1, envelope				Cytosol (Approved); Additional: Centrosome				0.0	0.0	0.0	0.0	0.0	0.0	0.0	0.0	0.0	0.0	0.0	0.0	0.0	0.0	0.0	0.0	0.0	0.0	0.0
ZNF347	84671	symbol	H. sapiens	84671	H. sapiens	ZNF347	zinc finger protein 347			Transcription factors:Zinc-coordinating DNA-binding domains; Predicted intracellular proteins	Microtubules (Approved)				0.0	0.0	0.0	0.0	0.0	0.0	0.0	0.0	0.0	0.0	0.0	0.0	0.0	0.0	0.0	0.0	0.0	0.0	0.0
ZNF761	388561	symbol	H. sapiens	388561	H. sapiens	ZNF761	zinc finger protein 761			Predicted intracellular proteins					0.0	0.0	0.0	0.0	0.0	0.0	0.0	0.0	0.0	0.0	0.0	0.0	0.0	0.0	0.0	0.0	0.0	0.0	0.0
ZNF813	126017	symbol	H. sapiens	126017	H. sapiens	ZNF813	zinc finger protein 813			Transcription factors:Zinc-coordinating DNA-binding domains; Predicted intracellular proteins	Vesicles (Approved)				0.0	0.0	0.0	0.0	0.0	0.0	0.0	0.0	0.0	0.0	0.0	0.0	0.0	0.0	0.0	0.0	0.0	0.0	0.0
RP4-576H24.4						None	None	None	None	None	None	None	None	None	nan	nan	nan	nan	nan	nan	nan	nan	nan	nan	nan	nan	nan	nan	nan	nan	nan	nan	nan
SIRPB1	10326	symbol	H. sapiens	10326	H. sapiens	SIRPB1	signal regulatory protein beta 1	GO:0050766 positive regulation of phagocytosis;GO:0050764 regulation of phagocytosis;GO:0050870 positive regulation of T cell activation		CD markers; Transporters:Accessory Factors Involved in Transport; Predicted intracellular proteins	Vesicles (Uncertain); Additional: Centrosome				0.0	0.0	0.0	0.0	0.0	0.0	0.0	0.0	0.0	0.0	0.0	0.0	0.0	0.0	0.0	0.0	0.0	0.0	0.0
HELZ2	85441	symbol	H. sapiens	85441	H. sapiens	HELZ2	helicase with zinc finger 2	GO:0090501 RNA phosphodiester bond hydrolysis;GO:0090305 nucleic acid phosphodiester bond hydrolysis;GO:0035194 RNA-mediated post-transcriptional gene silencing		Predicted intracellular proteins				(M5911)HALLMARK INTERFERON ALPHA RESPONSE; (M5913)HALLMARK INTERFERON GAMMA RESPONSE	0.0	0.0	0.0	0.0	0.0	0.0	0.0	0.0	0.0	0.0	0.0	0.0	0.0	0.0	0.0	0.0	0.0	0.0	0.0
TPTE	7179	symbol	H. sapiens	7179	H. sapiens	TPTE	transmembrane phosphatase with tensin homology	GO:0016311 dephosphorylation;GO:0006796 phosphate-containing compound metabolic process;GO:0006793 phosphorus metabolic process		Enzymes; ENZYME proteins:Hydrolases	Cytosol (Approved); Additional: Endoplasmic reticulum				0.0	0.0	0.0	0.0	0.0	0.0	0.0	0.0	0.0	0.0	0.0	0.0	0.0	0.0	0.0	0.0	0.0	0.0	0.0
APOBEC3B	9582	symbol	H. sapiens	9582	H. sapiens	APOBEC3B	apolipoprotein B mRNA editing enzyme catalytic subunit 3B	GO:0070383 DNA cytosine deamination;GO:0006216 cytidine catabolic process;GO:0009972 cytidine deamination		Cancer-related genes; Enzymes; Predicted intracellular proteins; ENZYME proteins:Hydrolases	Nucleoplasm (Approved)				0.0	0.0	0.0	0.0	0.0	0.0	0.0	0.0	0.0	0.0	0.0	0.0	0.0	0.0	0.0	0.0	0.0	0.0	0.0

## Sheet: Enrichment
GroupID	Category	Term	Description	LogP	Log(q-value)	InTerm_InList	Genes	Symbols
1_Summary	GO Biological Processes	GO:0007156	homophilic cell adhesion via plasma membrane adhesion molecules	-35.1216	-30.7721	33/167	6092,8641,9708,9752,56099,56100,56101,56102,56103,56104,56105,56106,56107,56108,56109,56110,56111,56112,56113,56114,56139,56140,56141,56142,56143,56144,56145,56146,56147,65217,152330,221935,256158,2895,57451,6093,7455,9369,53942,342035	ROBO2,PCDHGB4,PCDHGA8,PCDHA9,PCDHGB7,PCDHGB6,PCDHGB5,PCDHGB3,PCDHGB2,PCDHGB1,PCDHGA11,PCDHGA10,PCDHGA9,PCDHGA7,PCDHGA6,PCDHGA5,PCDHGA4,PCDHGA3,PCDHGA2,PCDHGA1,PCDHA10,PCDHA8,PCDHA7,PCDHA6,PCDHA5,PCDHA4,PCDHA3,PCDHA2,PCDHA1,PCDH15,CNTN4,SDK1,HMCN2,GRID2,TENM2,ROCK1,ZAN,NRXN3,CNTN5,GLDN
1_Member	GO Biological Processes	GO:0007156	homophilic cell adhesion via plasma membrane adhesion molecules	-35.1216	-30.7721	33/167	6092,8641,9708,9752,56099,56100,56101,56102,56103,56104,56105,56106,56107,56108,56109,56110,56111,56112,56113,56114,56139,56140,56141,56142,56143,56144,56145,56146,56147,65217,152330,221935,256158	ROBO2,PCDHGB4,PCDHGA8,PCDHA9,PCDHGB7,PCDHGB6,PCDHGB5,PCDHGB3,PCDHGB2,PCDHGB1,PCDHGA11,PCDHGA10,PCDHGA9,PCDHGA7,PCDHGA6,PCDHGA5,PCDHGA4,PCDHGA3,PCDHGA2,PCDHGA1,PCDHA10,PCDHA8,PCDHA7,PCDHA6,PCDHA5,PCDHA4,PCDHA3,PCDHA2,PCDHA1,PCDH15,CNTN4,SDK1,HMCN2
1_Member	GO Biological Processes	GO:0098742	cell-cell adhesion via plasma-membrane adhesion molecules	-31.1526	-27.1041	35/260	2895,6092,8641,9708,9752,56099,56100,56101,56102,56103,56104,56105,56106,56107,56108,56109,56110,56111,56112,56113,56114,56139,56140,56141,56142,56143,56144,56145,56146,56147,57451,65217,152330,221935,256158	GRID2,ROBO2,PCDHGB4,PCDHGA8,PCDHA9,PCDHGB7,PCDHGB6,PCDHGB5,PCDHGB3,PCDHGB2,PCDHGB1,PCDHGA11,PCDHGA10,PCDHGA9,PCDHGA7,PCDHGA6,PCDHGA5,PCDHGA4,PCDHGA3,PCDHGA2,PCDHGA1,PCDHA10,PCDHA8,PCDHA7,PCDHA6,PCDHA5,PCDHA4,PCDHA3,PCDHA2,PCDHA1,TENM2,PCDH15,CNTN4,SDK1,HMCN2
1_Member	GO Biological Processes	GO:0098609	cell-cell adhesion	-25.7204	-21.8481	40/531	2895,6092,6093,7455,8641,9369,9708,9752,53942,56099,56100,56101,56102,56103,56104,56105,56106,56107,56108,56109,56110,56111,56112,56113,56114,56139,56140,56141,56142,56143,56144,56145,56146,56147,57451,65217,152330,221935,256158,342035	GRID2,ROBO2,ROCK1,ZAN,PCDHGB4,NRXN3,PCDHGA8,PCDHA9,CNTN5,PCDHGB7,PCDHGB6,PCDHGB5,PCDHGB3,PCDHGB2,PCDHGB1,PCDHGA11,PCDHGA10,PCDHGA9,PCDHGA7,PCDHGA6,PCDHGA5,PCDHGA4,PCDHGA3,PCDHGA2,PCDHGA1,PCDHA10,PCDHA8,PCDHA7,PCDHA6,PCDHA5,PCDHA4,PCDHA3,PCDHA2,PCDHA1,TENM2,PCDH15,CNTN4,SDK1,HMCN2,GLDN
2_Summary	GO Biological Processes	GO:0051606	detection of stimulus	-7.9675	-4.22009	23/669	2792,4671,10242,10333,23746,26338,57053,79473,81309,81327,81328,120065,162998,219436,219437,219438,222662,256148,259289,346007,390073,390075,390142,1208,3778,5864,65217	GNGT1,NAIP,KCNMB2,TLR6,AIPL1,OR5L2,CHRNA10,OR52N1,OR4C15,OR4A16,OR4A15,OR5P2,OR7D2,OR5D14,OR5L1,OR5D18,LHFPL5,OR4S1,TAS2R43,EYS,OR56B2P,OR52N5,OR5D13,CLPS,KCNMA1,RAB3A,PCDH15
2_Member	GO Biological Processes	GO:0051606	detection of stimulus	-7.9675	-4.22009	23/669	2792,4671,10242,10333,23746,26338,57053,79473,81309,81327,81328,120065,162998,219436,219437,219438,222662,256148,259289,346007,390073,390075,390142	GNGT1,NAIP,KCNMB2,TLR6,AIPL1,OR5L2,CHRNA10,OR52N1,OR4C15,OR4A16,OR4A15,OR5P2,OR7D2,OR5D14,OR5L1,OR5D18,LHFPL5,OR4S1,TAS2R43,EYS,OR56B2P,OR52N5,OR5D13
2_Member	Reactome Gene Sets	R-HSA-9709957	Sensory Perception	-7.19565	-3.69128	21/621	1208,2792,3778,5864,26338,57053,65217,79473,81309,81327,81328,120065,162998,219436,219437,219438,222662,256148,259289,390075,390142	CLPS,GNGT1,KCNMA1,RAB3A,OR5L2,CHRNA10,PCDH15,OR52N1,OR4C15,OR4A16,OR4A15,OR5P2,OR7D2,OR5D14,OR5L1,OR5D18,LHFPL5,OR4S1,TAS2R43,OR52N5,OR5D13
2_Member	GO Biological Processes	GO:0050906	detection of stimulus involved in sensory perception	-6.07161	-2.72214	18/547	26338,57053,79473,81309,81327,81328,120065,162998,219436,219437,219438,222662,256148,259289,346007,390073,390075,390142	OR5L2,CHRNA10,OR52N1,OR4C15,OR4A16,OR4A15,OR5P2,OR7D2,OR5D14,OR5L1,OR5D18,LHFPL5,OR4S1,TAS2R43,EYS,OR56B2P,OR52N5,OR5D13
2_Member	GO Biological Processes	GO:0009593	detection of chemical stimulus	-5.81657	-2.50849	17/512	10242,10333,26338,79473,81309,81327,81328,120065,162998,219436,219437,219438,256148,259289,390073,390075,390142	KCNMB2,TLR6,OR5L2,OR52N1,OR4C15,OR4A16,OR4A15,OR5P2,OR7D2,OR5D14,OR5L1,OR5D18,OR4S1,TAS2R43,OR56B2P,OR52N5,OR5D13
2_Member	GO Biological Processes	GO:0050907	detection of chemical stimulus involved in sensory perception	-4.89562	-1.69227	15/479	26338,79473,81309,81327,81328,120065,162998,219436,219437,219438,256148,259289,390073,390075,390142	OR5L2,OR52N1,OR4C15,OR4A16,OR4A15,OR5P2,OR7D2,OR5D14,OR5L1,OR5D18,OR4S1,TAS2R43,OR56B2P,OR52N5,OR5D13
2_Member	GO Biological Processes	GO:0050911	detection of chemical stimulus involved in sensory perception of smell	-4.78072	-1.60734	14/431	26338,79473,81309,81327,81328,120065,162998,219436,219437,219438,256148,390073,390075,390142	OR5L2,OR52N1,OR4C15,OR4A16,OR4A15,OR5P2,OR7D2,OR5D14,OR5L1,OR5D18,OR4S1,OR56B2P,OR52N5,OR5D13
2_Member	Reactome Gene Sets	R-HSA-9752946	Expression and translocation of olfactory receptors	-4.60602	-1.46067	13/389	26338,79473,81309,81327,81328,120065,162998,219436,219437,219438,256148,390075,390142	OR5L2,OR52N1,OR4C15,OR4A16,OR4A15,OR5P2,OR7D2,OR5D14,OR5L1,OR5D18,OR4S1,OR52N5,OR5D13
2_Member	Reactome Gene Sets	R-HSA-381753	Olfactory Signaling Pathway	-4.51459	-1.40746	13/397	26338,79473,81309,81327,81328,120065,162998,219436,219437,219438,256148,390075,390142	OR5L2,OR52N1,OR4C15,OR4A16,OR4A15,OR5P2,OR7D2,OR5D14,OR5L1,OR5D18,OR4S1,OR52N5,OR5D13
2_Member	GO Biological Processes	GO:0007608	sensory perception of smell	-4.50166	-1.40746	14/457	26338,79473,81309,81327,81328,120065,162998,219436,219437,219438,256148,390073,390075,390142	OR5L2,OR52N1,OR4C15,OR4A16,OR4A15,OR5P2,OR7D2,OR5D14,OR5L1,OR5D18,OR4S1,OR56B2P,OR52N5,OR5D13
2_Member	GO Biological Processes	GO:0007606	sensory perception of chemical stimulus	-4.34299	-1.29455	15/535	26338,79473,81309,81327,81328,120065,162998,219436,219437,219438,256148,259289,390073,390075,390142	OR5L2,OR52N1,OR4C15,OR4A16,OR4A15,OR5P2,OR7D2,OR5D14,OR5L1,OR5D18,OR4S1,TAS2R43,OR56B2P,OR52N5,OR5D13
2_Member	KEGG Pathway	hsa04740	Olfactory transduction	-4.0712	-1.06415	13/439	26338,79473,81309,81327,81328,120065,162998,219436,219437,219438,256148,390075,390142	OR5L2,OR52N1,OR4C15,OR4A16,OR4A15,OR5P2,OR7D2,OR5D14,OR5L1,OR5D18,OR4S1,OR52N5,OR5D13
3_Summary	Reactome Gene Sets	R-HSA-189085	Digestion of dietary carbohydrate	-7.77941	-4.12891	5/11	276,277,278,279,280,1208,1056,3778,5644,5645,5554	AMY1A,AMY1B,AMY1C,AMY2A,AMY2B,CLPS,CEL,KCNMA1,PRSS1,PRSS2,PRH1
3_Member	Reactome Gene Sets	R-HSA-189085	Digestion of dietary carbohydrate	-7.77941	-4.12891	5/11	276,277,278,279,280	AMY1A,AMY1B,AMY1C,AMY2A,AMY2B
3_Member	Reactome Gene Sets	R-HSA-8935690	Digestion	-7.69235	-4.12103	6/22	276,277,278,279,280,1208	AMY1A,AMY1B,AMY1C,AMY2A,AMY2B,CLPS
3_Member	Reactome Gene Sets	R-HSA-8963743	Digestion and absorption	-7.10893	-3.66255	6/27	276,277,278,279,280,1208	AMY1A,AMY1B,AMY1C,AMY2A,AMY2B,CLPS
3_Member	KEGG Pathway	hsa04972	Pancreatic secretion	-6.72987	-3.33464	9/102	276,277,278,279,280,1056,3778,5644,5645	AMY1A,AMY1B,AMY1C,AMY2A,AMY2B,CEL,KCNMA1,PRSS1,PRSS2
3_Member	KEGG Pathway	hsa00500	Starch and sucrose metabolism	-4.9412	-1.69227	5/36	276,277,278,279,280	AMY1A,AMY1B,AMY1C,AMY2A,AMY2B
3_Member	KEGG Pathway	hsa04970	Salivary secretion	-4.9267	-1.69227	7/92	276,277,278,279,280,3778,5554	AMY1A,AMY1B,AMY1C,AMY2A,AMY2B,KCNMA1,PRH1
3_Member	KEGG Pathway	hsa04973	Carbohydrate digestion and absorption	-4.36396	-1.29455	5/47	276,277,278,279,280	AMY1A,AMY1B,AMY1C,AMY2A,AMY2B
4_Summary	GO Biological Processes	GO:0051092	positive regulation of NF-kappaB transcription factor activity	-4.2421	-1.21485	8/159	8809,9175,10333,23085,53840,83696,85363,117854,79097	IL18R1,MAP3K13,TLR6,ERC1,TRIM34,TRAPPC9,TRIM5,TRIM6,TRIM48
4_Member	GO Biological Processes	GO:0051092	positive regulation of NF-kappaB transcription factor activity	-4.2421	-1.21485	8/159	8809,9175,10333,23085,53840,83696,85363,117854	IL18R1,MAP3K13,TLR6,ERC1,TRIM34,TRAPPC9,TRIM5,TRIM6
4_Member	GO Biological Processes	GO:0051091	positive regulation of DNA-binding transcription factor activity	-2.69982	0	8/271	8809,9175,10333,23085,53840,83696,85363,117854	IL18R1,MAP3K13,TLR6,ERC1,TRIM34,TRAPPC9,TRIM5,TRIM6
4_Member	Reactome Gene Sets	R-HSA-877300	Interferon gamma signaling	-2.1386	0	4/92	53840,79097,85363,117854	TRIM34,TRIM48,TRIM5,TRIM6
4_Member	GO Biological Processes	GO:0046596	regulation of viral entry into host cell	-2.13195	0	3/48	53840,85363,117854	TRIM34,TRIM5,TRIM6
5_Summary	Canonical Pathways	M3008	NABA ECM GLYCOPROTEINS	-3.61396	-0.626219	8/196	1842,4052,64094,79987,80144,256158,342035,346007	ECM2,LTBP1,SMOC2,SVEP1,FRAS1,HMCN2,GLDN,EYS
5_Member	Canonical Pathways	M3008	NABA ECM GLYCOPROTEINS	-3.61396	-0.626219	8/196	1842,4052,64094,79987,80144,256158,342035,346007	ECM2,LTBP1,SMOC2,SVEP1,FRAS1,HMCN2,GLDN,EYS
5_Member	Canonical Pathways	M5884	NABA CORE MATRISOME	-2.66042	0	8/275	1842,4052,64094,79987,80144,256158,342035,346007	ECM2,LTBP1,SMOC2,SVEP1,FRAS1,HMCN2,GLDN,EYS
6_Summary	GO Biological Processes	GO:0007586	digestion	-3.51959	-0.550332	6/109	279,1056,1208,5644,5645,340204	AMY2A,CEL,CLPS,PRSS1,PRSS2,CLPSL1
6_Member	GO Biological Processes	GO:0007586	digestion	-3.51959	-0.550332	6/109	279,1056,1208,5644,5645,340204	AMY2A,CEL,CLPS,PRSS1,PRSS2,CLPSL1
7_Summary	Reactome Gene Sets	R-HSA-9659379	Sensory processing of sound	-3.36785	-0.416315	5/76	3778,5864,57053,65217,222662,53942,152137,375612,2792,23746,346007	KCNMA1,RAB3A,CHRNA10,PCDH15,LHFPL5,CNTN5,CCDC50,LHFPL3,GNGT1,AIPL1,EYS
7_Member	Reactome Gene Sets	R-HSA-9659379	Sensory processing of sound	-3.36785	-0.416315	5/76	3778,5864,57053,65217,222662	KCNMA1,RAB3A,CHRNA10,PCDH15,LHFPL5
7_Member	GO Biological Processes	GO:0050954	sensory perception of mechanical stimulus	-3.11722	-0.272902	7/179	5864,53942,57053,65217,152137,222662,375612	RAB3A,CNTN5,CHRNA10,PCDH15,CCDC50,LHFPL5,LHFPL3
7_Member	Reactome Gene Sets	R-HSA-9662361	Sensory processing of sound by outer hair cells of the cochlea	-2.97878	-0.173372	4/54	3778,57053,65217,222662	KCNMA1,CHRNA10,PCDH15,LHFPL5
7_Member	GO Biological Processes	GO:0007605	sensory perception of sound	-2.70649	0	6/156	53942,57053,65217,152137,222662,375612	CNTN5,CHRNA10,PCDH15,CCDC50,LHFPL5,LHFPL3
7_Member	Reactome Gene Sets	R-HSA-9662360	Sensory processing of sound by inner hair cells of the cochlea	-2.58403	0	4/69	3778,5864,65217,222662	KCNMA1,RAB3A,PCDH15,LHFPL5
7_Member	GO Biological Processes	GO:0009581	detection of external stimulus	-2.2924	0	5/133	2792,23746,57053,222662,346007	GNGT1,AIPL1,CHRNA10,LHFPL5,EYS
7_Member	GO Biological Processes	GO:0009582	detection of abiotic stimulus	-2.25186	0	5/136	2792,23746,57053,222662,346007	GNGT1,AIPL1,CHRNA10,LHFPL5,EYS
8_Summary	GO Biological Processes	GO:0008038	neuron recognition	-3.24366	-0.309162	4/46	2042,6092,9037,152330,7455,56141,9369,53942,256158,5864,6093,10427,222662	EPHA3,ROBO2,SEMA5A,CNTN4,ZAN,PCDHA7,NRXN3,CNTN5,HMCN2,RAB3A,ROCK1,SEC24B,LHFPL5
8_Member	GO Biological Processes	GO:0008038	neuron recognition	-3.24366	-0.309162	4/46	2042,6092,9037,152330	EPHA3,ROBO2,SEMA5A,CNTN4
8_Member	GO Biological Processes	GO:0007413	axonal fasciculation	-3.17473	-0.304094	3/21	2042,9037,152330	EPHA3,SEMA5A,CNTN4
8_Member	GO Biological Processes	GO:0106030	neuron projection fasciculation	-3.17473	-0.304094	3/21	2042,9037,152330	EPHA3,SEMA5A,CNTN4
8_Member	GO Biological Processes	GO:0008037	cell recognition	-3.02763	-0.201295	6/135	2042,6092,7455,9037,56141,152330	EPHA3,ROBO2,ZAN,SEMA5A,PCDHA7,CNTN4
8_Member	GO Biological Processes	GO:0007411	axon guidance	-2.64857	0	7/216	2042,6092,9037,9369,53942,152330,256158	EPHA3,ROBO2,SEMA5A,NRXN3,CNTN5,CNTN4,HMCN2
8_Member	GO Biological Processes	GO:0097485	neuron projection guidance	-2.64857	0	7/216	2042,6092,9037,9369,53942,152330,256158	EPHA3,ROBO2,SEMA5A,NRXN3,CNTN5,CNTN4,HMCN2
8_Member	GO Biological Processes	GO:0000904	cell morphogenesis involved in differentiation	-2.57924	0	11/487	2042,5864,6092,6093,9037,9369,10427,53942,152330,222662,256158	EPHA3,RAB3A,ROBO2,ROCK1,SEMA5A,NRXN3,SEC24B,CNTN5,CNTN4,LHFPL5,HMCN2
8_Member	GO Biological Processes	GO:0048667	cell morphogenesis involved in neuron differentiation	-2.56689	0	10/418	2042,5864,6092,9037,9369,10427,53942,152330,222662,256158	EPHA3,RAB3A,ROBO2,SEMA5A,NRXN3,SEC24B,CNTN5,CNTN4,LHFPL5,HMCN2
8_Member	GO Biological Processes	GO:0007409	axonogenesis	-2.06139	0	8/347	2042,5864,6092,9037,9369,53942,152330,256158	EPHA3,RAB3A,ROBO2,SEMA5A,NRXN3,CNTN5,CNTN4,HMCN2
9_Summary	Reactome Gene Sets	R-HSA-112316	Neuronal System	-3.17086	-0.304094	11/410	774,1740,2066,2792,2915,3751,3778,5864,9369,10242,57497	CACNA1B,DLG2,ERBB4,GNGT1,GRM5,KCND2,KCNMA1,RAB3A,NRXN3,KCNMB2,LRFN2
9_Member	Reactome Gene Sets	R-HSA-112316	Neuronal System	-3.17086	-0.304094	11/410	774,1740,2066,2792,2915,3751,3778,5864,9369,10242,57497	CACNA1B,DLG2,ERBB4,GNGT1,GRM5,KCND2,KCNMA1,RAB3A,NRXN3,KCNMB2,LRFN2
9_Member	Reactome Gene Sets	R-HSA-6794362	Protein-protein interactions at synapses	-2.24112	0	4/86	1740,2915,9369,57497	DLG2,GRM5,NRXN3,LRFN2
10_Summary	GO Biological Processes	GO:0007268	chemical synaptic transmission	-3.1622	-0.304094	11/411	774,1740,2257,2895,2913,2915,3751,5864,9228,23085,57053,1442,2689,5644,5645,84539,259289,4920,57497,152330	CACNA1B,DLG2,FGF12,GRID2,GRM3,GRM5,KCND2,RAB3A,DLGAP2,ERC1,CHRNA10,CSH1,GH2,PRSS1,PRSS2,MCHR2,TAS2R43,ROR2,LRFN2,CNTN4
10_Member	GO Biological Processes	GO:0007268	chemical synaptic transmission	-3.1622	-0.304094	11/411	774,1740,2257,2895,2913,2915,3751,5864,9228,23085,57053	CACNA1B,DLG2,FGF12,GRID2,GRM3,GRM5,KCND2,RAB3A,DLGAP2,ERC1,CHRNA10
10_Member	GO Biological Processes	GO:0098916	anterograde trans-synaptic signaling	-3.1622	-0.304094	11/411	774,1740,2257,2895,2913,2915,3751,5864,9228,23085,57053	CACNA1B,DLG2,FGF12,GRID2,GRM3,GRM5,KCND2,RAB3A,DLGAP2,ERC1,CHRNA10
10_Member	GO Biological Processes	GO:0099537	trans-synaptic signaling	-3.01929	-0.201295	11/428	774,1740,2257,2895,2913,2915,3751,5864,9228,23085,57053	CACNA1B,DLG2,FGF12,GRID2,GRM3,GRM5,KCND2,RAB3A,DLGAP2,ERC1,CHRNA10
10_Member	GO Biological Processes	GO:0099536	synaptic signaling	-2.79289	-0.023198	11/457	774,1740,2257,2895,2913,2915,3751,5864,9228,23085,57053	CACNA1B,DLG2,FGF12,GRID2,GRM3,GRM5,KCND2,RAB3A,DLGAP2,ERC1,CHRNA10
10_Member	KEGG Pathway	hsa04080	Neuroactive ligand-receptor interaction	-2.43036	0	9/367	1442,2689,2895,2913,2915,5644,5645,57053,84539	CSH1,GH2,GRID2,GRM3,GRM5,PRSS1,PRSS2,CHRNA10,MCHR2
10_Member	Reactome Gene Sets	R-HSA-420499	Class C/3 (Metabotropic glutamate/pheromone receptors)	-2.41744	0	3/38	2913,2915,259289	GRM3,GRM5,TAS2R43
10_Member	GO Biological Processes	GO:0007215	glutamate receptor signaling pathway	-2.18337	0	3/46	2895,2913,2915	GRID2,GRM3,GRM5
10_Member	GO Biological Processes	GO:0050804	modulation of chemical synaptic transmission	-2.10937	0	10/487	774,2895,2913,2915,4920,5864,9228,23085,57497,152330	CACNA1B,GRID2,GRM3,GRM5,ROR2,RAB3A,DLGAP2,ERC1,LRFN2,CNTN4
10_Member	GO Biological Processes	GO:0099177	regulation of trans-synaptic signaling	-2.10345	0	10/488	774,2895,2913,2915,4920,5864,9228,23085,57497,152330	CACNA1B,GRID2,GRM3,GRM5,ROR2,RAB3A,DLGAP2,ERC1,LRFN2,CNTN4
11_Summary	GO Biological Processes	GO:0050808	synapse organization	-2.85615	-0.0671032	9/317	577,2066,2895,2915,5864,23085,53942,221935,256158,5796,79987	ADGRB3,ERBB4,GRID2,GRM5,RAB3A,ERC1,CNTN5,SDK1,HMCN2,PTPRK,SVEP1
11_Member	GO Biological Processes	GO:0050808	synapse organization	-2.85615	-0.0671032	9/317	577,2066,2895,2915,5864,23085,53942,221935,256158	ADGRB3,ERBB4,GRID2,GRM5,RAB3A,ERC1,CNTN5,SDK1,HMCN2
11_Member	GO Biological Processes	GO:0099558	maintenance of synapse structure	-2.84837	-0.0671032	3/27	577,5864,23085	ADGRB3,RAB3A,ERC1
11_Member	GO Biological Processes	GO:0034330	cell junction organization	-2.40902	0	11/513	577,2066,2895,2915,5796,5864,23085,53942,79987,221935,256158	ADGRB3,ERBB4,GRID2,GRM5,PTPRK,RAB3A,ERC1,CNTN5,SVEP1,SDK1,HMCN2
11_Member	GO Biological Processes	GO:0034331	cell junction maintenance	-2.18337	0	3/46	577,5864,23085	ADGRB3,RAB3A,ERC1
12_Summary	GO Biological Processes	GO:0002825	regulation of T-helper 1 type immune response	-2.71392	0	3/30	3593,8809,9173,5144,10225	IL12B,IL18R1,IL1RL1,PDE4D,CD96
12_Member	GO Biological Processes	GO:0002825	regulation of T-helper 1 type immune response	-2.71392	0	3/30	3593,8809,9173	IL12B,IL18R1,IL1RL1
12_Member	GO Biological Processes	GO:0032649	regulation of type II interferon production	-2.51326	0	5/118	3593,5144,8809,9173,10225	IL12B,PDE4D,IL18R1,IL1RL1,CD96
13_Summary	GO Biological Processes	GO:0042531	positive regulation of tyrosine phosphorylation of STAT protein	-2.63071	0	4/67	1442,2066,2689,3593,2915,79705	CSH1,ERBB4,GH2,IL12B,GRM5,LRRK1
13_Member	GO Biological Processes	GO:0042531	positive regulation of tyrosine phosphorylation of STAT protein	-2.63071	0	4/67	1442,2066,2689,3593	CSH1,ERBB4,GH2,IL12B
13_Member	GO Biological Processes	GO:0050731	positive regulation of peptidyl-tyrosine phosphorylation	-2.38713	0	6/181	1442,2066,2689,2915,3593,79705	CSH1,ERBB4,GH2,GRM5,IL12B,LRRK1
13_Member	GO Biological Processes	GO:0046427	positive regulation of receptor signaling pathway via JAK-STAT	-2.38532	0	3/39	1442,2066,2689	CSH1,ERBB4,GH2
13_Member	GO Biological Processes	GO:0042509	regulation of tyrosine phosphorylation of STAT protein	-2.31425	0	4/82	1442,2066,2689,3593	CSH1,ERBB4,GH2,IL12B
13_Member	GO Biological Processes	GO:1904894	positive regulation of receptor signaling pathway via STAT	-2.2654	0	3/43	1442,2066,2689	CSH1,ERBB4,GH2
14_Summary	GO Biological Processes	GO:0070252	actin-mediated cell contraction	-2.60718	0	4/68	2257,6093,6444,54749	FGF12,ROCK1,SGCD,EPDR1
14_Member	GO Biological Processes	GO:0070252	actin-mediated cell contraction	-2.60718	0	4/68	2257,6093,6444,54749	FGF12,ROCK1,SGCD,EPDR1
14_Member	GO Biological Processes	GO:0030048	actin filament-based movement	-2.09026	0	4/95	2257,6093,6444,54749	FGF12,ROCK1,SGCD,EPDR1
15_Summary	GO Biological Processes	GO:0050691	regulation of defense response to virus by host	-2.29418	0	3/42	3593,117854,377630	IL12B,TRIM6,USP17L2
15_Member	GO Biological Processes	GO:0050691	regulation of defense response to virus by host	-2.29418	0	3/42	3593,117854,377630	IL12B,TRIM6,USP17L2
16_Summary	GO Biological Processes	GO:0043507	positive regulation of JUN kinase activity	-2.2654	0	3/43	4920,9175,10333,1588,8626	ROR2,MAP3K13,TLR6,CYP19A1,TP63
16_Member	GO Biological Processes	GO:0043507	positive regulation of JUN kinase activity	-2.2654	0	3/43	4920,9175,10333	ROR2,MAP3K13,TLR6
16_Member	GO Biological Processes	GO:0048806	genitalia development	-2.15735	0	3/47	1588,4920,8626	CYP19A1,ROR2,TP63
17_Summary	GO Biological Processes	GO:0060976	coronary vasculature development	-2.18337	0	3/46	6444,10427,11174	SGCD,SEC24B,ADAMTS6
17_Member	GO Biological Processes	GO:0060976	coronary vasculature development	-2.18337	0	3/46	6444,10427,11174	SGCD,SEC24B,ADAMTS6
18_Summary	WikiPathways	WP3925	Amino acid metabolism	-2.15513	0	4/91	216,1644,4594,151742	ALDH1A1,DDC,MMUT,PPM1L
18_Member	WikiPathways	WP3925	Amino acid metabolism	-2.15513	0	4/91	216,1644,4594,151742	ALDH1A1,DDC,MMUT,PPM1L
19_Summary	GO Biological Processes	GO:0120254	olefinic compound metabolic process	-2.13655	0	5/145	216,1056,1588,8854,57834	ALDH1A1,CEL,CYP19A1,ALDH1A2,CYP4F11
19_Member	GO Biological Processes	GO:0120254	olefinic compound metabolic process	-2.13655	0	5/145	216,1056,1588,8854,57834	ALDH1A1,CEL,CYP19A1,ALDH1A2,CYP4F11
19_Member	GO Biological Processes	GO:0042572	retinol metabolic process	-2.01332	0	3/53	216,1056,8854	ALDH1A1,CEL,ALDH1A2
