# Supplementary material for: Ancient Trypsinogen Duplications Shape Pancreatic Disease Risk through Pseudogene Enhancers
Source: Research Square preprint supplement (doi:10.21203/rs.3.rs-8799261/v1), 2026-02-11
Supplement: Supplementary file 5 [file 5cc1bb73e984070bf811f133.xlsx]

## Sheet: Legend_References
Summary of pancreatitis epidemiology and genetic association studies of the PRSS1-PRSS2 locus.
a. Epidemiology studies.
b. Genetic association studies between pancreatitis and the PRSS1-PRSS2 locus
LD, linkage disequilibrium between the reported variants and the copy number structure of PRSS1-PRSS2 locus calculated by the related populations in the 1000 Genomes Project. AP, acute pancreatitis; CP, chronic pancreatitis; ACP, alcoholic pancreatitis; NACP, non-alcoholic pancreatitis.
References
Avanthi, S.U., Ravi Kanth, V.V., Agarwal, J., Lakhtakia, S., Gangineni, K., Rao, G.V., Reddy, D.N., and Talukdar, R. (2015). Association of claudin2 and PRSS1-PRSS2 polymorphisms with idiopathic recurrent acute and chronic pancreatitis: A case-control study from India. J Gastroenterol Hepatol 30, 1796-1801.
Campa, D., Pastore, M., Capurso, G., Hackert, T., Di Leo, M., Izbicki, J.R., Khaw, K.T., Gioffreda, D., Kupcinskas, J., Pasquali, C., et al. (2018). Do pancreatic cancer and chronic pancreatitis share the same genetic risk factors? A PANcreatic Disease ReseArch (PANDoRA) consortium investigation. Int J Cancer 142, 290-296.
Derikx, M.H., Kovacs, P., Scholz, M., Masson, E., Chen, J.M., Ruffert, C., Lichtner, P., te Morsche, R.H.M., Cavestro, G.M., Ferec, C., et al. (2015). Polymorphisms at PRSS1-PRSS2 and CLDN2-MORC4 loci associate with alcoholic and non-alcoholic chronic pancreatitis in a European replication study. Gut 64, 1426-1433.
Giri, A.K., Midha, S., Banerjee, P., Agrawal, A., Mehdi, S.J., Dhingra, R., Kaur, I., Kumar, G.R., Lakhotia, R., Ghosh, S., et al. (2016). Common Variants in CLDN2 and MORC4 Genes Confer Disease Susceptibility in Patients with Chronic Pancreatitis. Plos One 11.
Hegyi, E., Toth, A.Z., Vincze, A., Szentesi, A., Hegyi, P., and Sahin-Toth, M. (2020). Alcohol-dependent effect of PRSS1-PRSS2 haplotype in chronic pancreatitis. Gut 69, 1713-1715.
Iannuzzi, J.P., King, J.A., Leong, J.H., Quan, J.S., Windsor, J.W., Tanyingoh, D., Coward, S., Forbes, N., Heitman, S.J., Shaheen, A.A., et al. (2022). Global Incidence of Acute Pancreatitis Is Increasing Over Time: A Systematic Review and Meta-Analysis. Gastroenterology 162, 122-134.
Li, C.L., Jiang, M., Pan, C.Q., Li, J., and Xu, L.G. (2021). The global, regional, and national burden of acute pancreatitis in 204 countries and territories, 1990-2019. Bmc Gastroenterol 21.
Masamune, A., Nakano, E., Hamada, S., Kakuta, Y., Kume, K., and Shimosegawa, T. (2015). Common variants at PRSS1-PRSS2 and CLDN2-MORC4 loci associate with chronic pancreatitis in Japan. Gut 64, 1345-1346.
Masson, E., Ewers, M., Paliwal, S., Kume, K., Scotet, V., Cooper, D.N., Rebours, V., Buscail, L., Rouault, K., Group, G.S., et al. (2023). The PRSS3P2 and TRY7 deletion copy number variant modifies risk for chronic pancreatitis. Pancreatology 23, 48-56.
Ouyang, G.Q., Pan, G.D., Liu, Q., Wu, Y.R., Liu, Z., Lu, W.C., Li, S., Zhou, Z., and Wen, Y. (2020). The global, regional, and national burden of pancreatitis in 195 countries and territories, 1990-2017: a systematic analysis for the Global Burden of Disease Study 2017. Bmc Med 18.
Paliwal, S., Bhaskar, S., Nageshwar Reddy, D., Rao, G.V., Thomas, V., Singh, S.P., and Chandak, G.R. (2016). Association Analysis of PRSS1-PRSS2 and CLDN2-MORC4 Variants in Nonalcoholic Chronic Pancreatitis Using Tropical Calcific Pancreatitis as Model. Pancreas 45, 1153-1157.
Wang, Y.C., Mao, X.T., Yu, D., Mao, S.H., Li, Z.S., Zou, W.B., and Liao, Z. (2022). Alcohol amplifies the association between common variants at PRSS1-PRSS2 locus and chronic pancreatitis in a dose-dependent manner. Gut 71, 2369-2371.
Whitcomb, D.C., LaRusch, J., Krasinskas, A.M., Klei, L., Smith, J.P., Brand, R.E., Neoptolemos, J.P., Lerch, M.M., Tector, M., Sandhu, B.S., et al. (2012). Common genetic variants in the CLDN2 and PRSS1-PRSS2 loci alter risk for alcohol-related and sporadic pancreatitis. Nature Genetics 44, 1349-1354.
Yadav, D., Muddana, V., and O'Connell, M. (2011). Hospitalizations for Chronic Pancreatitis in Allegheny County, Pennsylvania, USA. Pancreatology 11, 546-552.
Yang, A.L., Vadhavkar, S., Singh, G., and Omary, B. (2008). Epidemiology of alcohol-related liver and pancreatic disease in the united states. Arch Intern Med 168, 649-656.

## Sheet: a. Epidemiology_Study
Study	Data source	Forms of pancreatitis	Incidence	Notes
Iannuzzi et al., 2022	literature search of population-based studies	AP	North America is highest, followed by Oceania, Europe and Asia; Consistent with our conclusion	Data shows large heterogeneity even in the same population, which was probably due to study design, composition of populations, diagnostic practices and data collection in different studies. No data from Africa were included.
Li et al., 2021	Global Burden of Disease Study 2019	AP	Europe is highest, followed by North America, South Asia, East Asia and Africa. Overall pattern is consistent with our conclusion, except for the unexpected low incidence in Africa.	Data shows large heterogeneity, and are absent and sparse in many regions and countries.
Ouyang et al., 2020	Global Burden of Disease Study 2017	AP+CP	Europe is highest, followed by North America, South Asia, East Asia and Africa. Overall pattern is consistent with our conclusion, except for the unexpected low incidence in Africa.	Data shows large heterogeneity, and are absent and sparse in many regions and countries.
Yadav et al., 2011	The Pennsylvania Health Care Cost Containment Council	CP	For both alcoholic and non-alcoholic chronic pancreatitis, black have higher hospitalization rate than white	Data only included black and white patients
Yang et al., 2008	Discharge records from the Nationwide Inpatient Sample	ACP and NACP	African American has the highest incidence, followed by European, Hispanic, Indian and Asian, which is consistent with our conclusion	The largest representative sample of US hospitals. See correlation of the incidence and long-form haplotype frequency in Figure 7C

## Sheet: b. Association_Study
Study	Study Population	Variant	LD (r2)	Sample Size	VAF	VAF	OR	p-Value (χ2 Test)
		(risk allele)		Cases/Controls	Cases	Controls	(95% CI)
ACP
Wang et al., 2022	Chinese	rs10273639[C]	0.872	97/504	0.479	0.283	2.34	5.1 × 10−7
							(1.68-3.25)
Whitcomb et al., 2012	European	rs10273639[C]	0.908	447/8029	0.696	0.576	1.68	2.03 × 10-12
							(1.45–1.95)
Derikx et al., 2015	European	rs10273639[C]	0.908	1854/5065	0.69	0.576	1.64	2.20 × 10-16
							(1.52–1.78)
Masamune et al., 2015	Japanese	rs10273639[C]	0.945	272/480	0.325	0.222	1.69	1.43 × 10-5
							(1.34–2.14)
Giri et al., 2016	Indian	rs2855983[G]	1	85/1288	0.488	0.34	1.85	0
							(1.36–2.53)
Hegyi et al., 2020	Hungarian	rs6666[C]	0.377	120/296	0.7	0.573	1.74	0.001
							(1.26–2.40)
NACP
Masson et al., 2023	European, Asian	PRSS3P2,TRY7 [long-form]	/	1536/3506	0.524	0.491	1.19	0.0001
							(1.09-1.30)
Wang et al., 2022)	Chinese	rs10273639[C]	0.872	318/504	0.336	0.283	1.29	0.026
							(1.03-1.61)
Whitcomb et al., 2012	European	rs10273639[C]	0.908	1129/8029	0.634	0.576	1.27	2.10 × 10-7
							(1.16–1.40)
Derikx et al., 2015	European	rs10273639[C]	0.908	1192/4323	0.596	0.576	1.09	0.085
							(0.99–1.19)
Masamune et al., 2015	Japanese	rs10273639[C]	0.945	197/480	0.305	0.222	1.54	0.0017
							(1.18–2.00)
Avanthi et al., 2015	Indian	rs10273639[C]	0.638	96/156	0.307	0.289	1.09	0.73
							(0.74–1.62)
Giri et al., 2016	Indian	rs2855983[G]	1	434/1288	0.42	0.34	1.4	3.07 × 10-5
							(1.20–1.64)
Paliwal et al., 2016	Indian	rs10273639[C]	0.638	551/801	0.338	0.269	1.38	0
							(1.17–1.64)
Campa et al., 2018	European	rs10273639[C]	0.908	345/4580	0.644	0.578	1.32	0.001
							(1.12–1.55)
Hegyi et al., 2020	Hungarian	rs6666[C]	0.377	103/296	0.631	0.573	1.28	0.17
							(0.92–1.77)
